# Supplementary material
Source: publisher figshare collection journal article supplement (https://acs.figshare.com/ndownloader/files/5885313)
Supplement: Supplementary file 1 [file 5885313]

# om020910k.cif

data_19
#------------------------------------------------------------------------------
_audit_creation_date                  '2002-09-02'
_audit_creation_method                'by teXsan v1.8'
_audit_update_record
;
?
;
#------------------------------------------------------------------------------
_publ_requested_journal               ' Organometallics '
_publ_requested_category              ' FM '
_publ_contact_author_name             ' Mark G. Humphrey '

_publ_contact_author_address
;
Department of Chemistry
Australian National University
Canberra ACT 0200
Australia
;

_publ_requested_coeditor_name          ?
_publ_contact_author_phone            ' 61 2 6125 2927 '
_publ_contact_author_fax              ' 61 2 6125 0760 '
_publ_contact_author_email            ' Mark.Humphrey@anu.edu.au '

loop_
_publ_author_name
_publ_author_address
' Lucas, Nigel T. '
;
Department of Chemistry
Australian National University
Canberra ACT 0200
Australia
;

' Notaras, Eleni G.A. '
;
Department of Chemistry
Australian National University
Canberra ACT 0200
Australia
;

' Petrie, Simon '
;
Department of Chemistry
Australian National University
Canberra ACT 0200
Australia
;

' Stranger, Robert '
;
Department of Chemistry
Australian National University
Canberra ACT 0200
Australia
;

' Humphrey, Mark G. '
;
Department of Chemistry
Australian National University
Canberra ACT 0200
Australia
;

_publ_section_title
;
Mixed-Metal Cluster Chemistry. 22. Synthesis, Crystallographic,
Electrochemical and Theoretical Studies of Alkyne-coordinated
Group 6-iridium Clusters Linked by Phenyleneethylene Groups
;

_publ_section_references
;
Altomare, A., Cascarano, M., Giacovazzo, C., Guagliardi, A.,
Burla, M.C., Polidori, G., Camalli, M. (1994). J. Appl. Cryst., 27, 435.

Coppens, P. (1970). The Evaluation of Absorption and Extinction in
Single-Crystal Structure Analysis. Crystallographic Computing. F. R. Ahmed,
S. R. Hall and C. P. Huber, eds., Munksgaard, Copenhagen. pp. 255-270.

Mackay, S., Gilmore, C.J., Edwards, C., Stewart, N. and Shankland, K.
(1999). maXus  Computer Program for the Solution and Refinement of
Crystal Structures. Nonius, The Netherlands, MacScience, Japan & The
University of Glasgow.

Molecular Structure Corporation. (1992-1997). teXsan.
Single Crystal Structure Analysis Software. Version 1.8.
MSC, 3200 Research Forest Drive, The Woodlands, TX 77381, USA.

Otwinowski, Z and Minor, W. (1997). In Methods in Enzymology, 276,
edited by C.W. Carter, Jr and R.M. Sweet, pp. 307-326,
New York: Academic Press.
;

#------------------------------------------------------------------------------
_computing_data_collection            'KappaCCD'
_computing_cell_refinement            'HKL Scalepack (Otwinowski & Minor 1997)'
_computing_data_reduction
;
Denzo and Scalepak (Otwinowski & Minor, 1997)
;

_computing_structure_solution
;
SIR92 (Altomare, et al. 1994)
;
_computing_structure_refinement       'teXsan (MSC, 1992-1997)'
_computing_publication_material       'teXsan (MSC, 1992-1997)'
#------------------------------------------------------------------------------
_cell_length_a                         9.8756(2)
_cell_length_b                         18.4541(3)
_cell_length_c                         19.2548(3)
_cell_angle_alpha                      90
_cell_angle_beta                       101.8589(8)
_cell_angle_gamma                      90
_cell_volume                           3434.20(9)
_cell_formula_units_Z                  2
_cell_measurement_temperature          473.2
_cell_measurement_reflns_used          122213
_cell_measurement_theta_min            2.910
_cell_measurement_theta_max            25.028
#------------------------------------------------------------------------------
_symmetry_cell_setting                 monoclinic
_symmetry_space_group_name_H-M        'P 21/c     '
_symmetry_Int_Tables_number            14
_symmetry_space_group_name_Hall        ?
loop_
_symmetry_equiv_pos_as_xyz
   '   +x,   +y,   +z'
   '   -x,1/2+y,1/2-z'
   '   -x,   -y,   -z'
   '   +x,1/2-y,1/2+z'
#------------------------------------------------------------------------------

_publ_section_exptl_prep
;
     ENTER EXPERIMENTAL SECTION
;
_exptl_crystal_description            'block'
_exptl_crystal_colour                 'dark green'
_exptl_crystal_size_max                0.15
_exptl_crystal_size_mid                0.15
_exptl_crystal_size_min                0.14
_exptl_crystal_density_diffrn          2.259
_exptl_crystal_density_meas            'not measured'
_chemical_formula_weight               2335.91
_chemical_formula_analytical           ?
_chemical_formula_sum                  'C72 H62 Ir4 Mo4 O16 '
_chemical_formula_moiety               'C72 H62 Ir4 Mo4 O16 '
_chemical_formula_structural           ?
_chemical_compound_source              ?
_exptl_crystal_F_000                   2196.00
_exptl_absorpt_coefficient_mu          8.511
_exptl_absorpt_correction_type         integration
_exptl_absorpt_process_details
;
Gaussian (Coppens, 1970) implemented in maXus (1999)
;

loop_
_exptl_crystal_face_index_h
_exptl_crystal_face_index_k
_exptl_crystal_face_index_l
_exptl_crystal_face_perp_dist
     0    1    0  0.040
     0   -1    0  0.100
     0    1    1  0.030
     1  -19   19  0.110
    -1    9   -9  0.030
    -3    0    2  0.110
     5   -2   -1  0.080
    -1   -4  -12  0.040

_exptl_absorpt_correction_T_min  0.303
_exptl_absorpt_correction_T_max  0.503

_exptl_special_details
;
  ?
;
#------------------------------------------------------------------------------
_diffrn_special_details
;
  ?
;
_diffrn_ambient_temperature            200
_diffrn_radiation_wavelength           0.7107
_diffrn_radiation_type                 'Mo K\a'
_diffrn_radiation_source              'fine-focus sealed tube'
_diffrn_radiation_monochromator        graphite
_diffrn_radiation_detector            'CCD'
_diffrn_measurement_device_type       'Nonius KappaCCD'
_diffrn_detector_area_resol_mean      ?
_diffrn_measurement_method            '\f and \w scans'

_diffrn_standards_number              0
_diffrn_standards_interval_count      0
_diffrn_standards_decay_%             0.00

_diffrn_reflns_number                  54003
_reflns_number_total                   6061
_reflns_number_gt                      3930
_reflns_threshold_expression            I>3.00\s(I)
_diffrn_reflns_av_R_equivalents        0.08741
_diffrn_reflns_av_sigmaI/netI          0.120
_diffrn_reflns_theta_full             ?
_diffrn_measured_fraction_theta_max   ?
_diffrn_measured_fraction_theta_full  ?
_diffrn_reflns_limit_h_min             -11
_diffrn_reflns_limit_h_max             11
_diffrn_reflns_limit_k_min             -21
_diffrn_reflns_limit_k_max             21
_diffrn_reflns_limit_l_min             -22
_diffrn_reflns_limit_l_max             22
_diffrn_reflns_theta_min               3.05
_diffrn_reflns_theta_max               25.07
_diffrn_reflns_reduction_process      'Lp corrections applied'
_diffrn_orient_matrix_UB_11            0.00000
_diffrn_orient_matrix_UB_12            0.00000
_diffrn_orient_matrix_UB_13            0.00000
_diffrn_orient_matrix_UB_21            0.00000
_diffrn_orient_matrix_UB_22            0.00000
_diffrn_orient_matrix_UB_23            0.00000
_diffrn_orient_matrix_UB_31            0.00000
_diffrn_orient_matrix_UB_32            0.00000
_diffrn_orient_matrix_UB_33            0.00000
#------------------------------------------------------------------------------
loop_
_atom_type_symbol
_atom_type_oxidation_number
_atom_type_number_in_cell
_atom_type_scat_dispersion_real
_atom_type_scat_dispersion_imag
_atom_type_scat_source
   C  0   144 0.002 0.002
;International Tables for Crystallography
(1992, Vol. C, Tables 4.2.6.8 and 6.1.1.1)
;
   H  0   124 0.000 0.000
;International Tables for Crystallography
(1992, Vol. C, Table 6.1.1.2)
;
   Ir 0     8 -2.066 7.990
;International Tables for Crystallography
(1992, Vol. C, Tables 4.2.6.8 and 6.1.1.1)
;
   Mo 0     8 -1.825 0.688
;International Tables for Crystallography
(1992, Vol. C, Tables 4.2.6.8 and 6.1.1.1)
;
   O  0    32 0.008 0.006
;International Tables for Crystallography
(1992, Vol. C, Tables 4.2.6.8 and 6.1.1.1)
;
#------------------------------------------------------------------------------
loop_
_atom_site_label
_atom_site_fract_x
_atom_site_fract_y
_atom_site_fract_z
_atom_site_U_iso_or_equiv
_atom_site_occupancy
_atom_site_refinement_flags
_atom_site_adp_type
_atom_site_calc_flag
_atom_site_calc_attached_atom
Ir(1) 0.21809(6) 0.22414(4) 0.64586(4) 0.0708(2) 1.000 . Uani d ?
Ir(2) 0.32890(7) 0.19614(4) 0.78267(4) 0.0654(2) 1.000 . Uani d ?
Mo(1) 0.1995(1) 0.3298(1) 0.75046(8) 0.0718(5) 1.000 . Uani d ?
Mo(2) 0.5048(1) 0.20191(8) 0.68508(8) 0.0647(5) 1.000 . Uani d ?
O(1) 0.132(2) 0.258(1) 0.4878(8) 0.162(8) 1.000 . Uani d ?
O(2) 0.003(2) 0.1036(9) 0.6381(9) 0.126(6) 1.000 . Uani d ?
O(3) 0.428(2) 0.1988(8) 0.9391(9) 0.107(6) 1.000 . Uani d ?
O(4) 0.179(2) 0.053(1) 0.7946(9) 0.151(8) 1.000 . Uani d ?
O(5) -0.055(1) 0.3205(9) 0.6236(7) 0.104(5) 1.000 . Uani d ?
O(6) 0.038(1) 0.2200(9) 0.8245(7) 0.103(5) 1.000 . Uani d ?
O(7) 0.343(1) 0.0938(8) 0.5734(8) 0.102(5) 1.000 . Uani d ?
O(8) 0.540(1) 0.0712(8) 0.7815(8) 0.102(5) 1.000 . Uani d ?
C(1) 0.165(2) 0.253(1) 0.543(1) 0.105(8) 1.000 . Uani d ?
C(2) 0.079(2) 0.149(2) 0.640(1) 0.110(9) 1.000 . Uani d ?
C(3) 0.395(2) 0.198(1) 0.880(1) 0.092(8) 1.000 . Uani d ?
C(4) 0.236(2) 0.107(1) 0.790(1) 0.103(9) 1.000 . Uani d ?
C(5) 0.045(2) 0.309(1) 0.663(1) 0.112(9) 1.000 . Uani d ?
C(6) 0.125(2) 0.248(1) 0.799(1) 0.092(7) 1.000 . Uani d ?
C(7) 0.374(2) 0.138(1) 0.613(1) 0.088(7) 1.000 . Uani d ?
C(8) 0.502(2) 0.125(1) 0.754(1) 0.073(6) 1.000 . Uani d ?
C(9) 0.119(4) 0.384(2) 0.845(2) 0.14(1) 1.000 . Uani d ?
C(10) 0.032(2) 0.405(2) 0.777(2) 0.13(1) 1.000 . Uani d ?
C(11) 0.100(2) 0.447(1) 0.735(1) 0.107(9) 1.000 . Uani d ?
C(12) 0.237(3) 0.449(1) 0.778(2) 0.11(1) 1.000 . Uani d ?
C(13) 0.251(4) 0.415(2) 0.843(2) 0.14(1) 1.000 . Uani d ?
C(14) 0.345(4) 0.411(2) 0.896(2) 0.16(1) 1.000 . Uani d ?
C(15) 0.716(3) 0.146(2) 0.685(2) 0.12(1) 1.000 . Uani d ?
C(16) 0.737(2) 0.223(3) 0.709(2) 0.17(2) 1.000 . Uani d ?
C(17) 0.691(3) 0.264(2) 0.668(3) 0.17(2) 1.000 . Uani d ?
C(18) 0.644(3) 0.236(3) 0.606(2) 0.14(1) 1.000 . Uani d ?
C(19) 0.659(2) 0.161(2) 0.617(2) 0.103(9) 1.000 . Uani d ?
C(20) 0.635(3) 0.104(3) 0.558(2) 0.24(2) 1.000 . Uani d ?
C(21) 0.192(6) 0.623(3) 0.544(3) 0.29(2) 1.000 . Uiso d ?
C(22) 0.144(5) 0.561(3) 0.525(3) 0.25(2) 1.000 . Uiso d ?
C(23) 0.240(4) 0.520(2) 0.502(2) 0.19(1) 1.000 . Uiso d ?
C(24) 0.348(3) 0.467(1) 0.542(1) 0.112(9) 1.000 . Uani d ?
C(25) 0.298(2) 0.419(1) 0.598(1) 0.107(8) 1.000 . Uani d ?
C(26) 0.403(2) 0.363(1) 0.6298(9) 0.073(6) 1.000 . Uani d ?
C(27) 0.367(2) 0.3038(9) 0.6791(9) 0.067(5) 1.000 . Uani d ?
C(28) 0.426(1) 0.2896(9) 0.7521(8) 0.059(5) 1.000 . Uani d ?
C(29) 0.543(2) 0.3334(9) 0.7979(8) 0.059(5) 1.000 . Uani d ?
C(30) 0.569(1) 0.4055(9) 0.7892(8) 0.060(5) 1.000 . Uani d ?
C(31) 0.674(2) 0.4410(8) 0.8324(8) 0.062(5) 1.000 . Uani d ?
C(32) 0.761(2) 0.4081(8) 0.8894(9) 0.063(5) 1.000 . Uani d ?
C(33) 0.740(2) 0.335(1) 0.8988(9) 0.081(6) 1.000 . Uani d ?
C(34) 0.631(2) 0.2968(9) 0.8532(9) 0.072(5) 1.000 . Uani d ?
C(35) 0.867(2) 0.4449(9) 0.9375(8) 0.062(5) 1.000 . Uani d ?
C(36) 0.952(2) 0.4795(9) 0.9761(8) 0.064(5) 1.000 . Uani d ?
H(9) 0.0934 0.3560 0.8823 0.165 1.000 . Uiso c ?
H(10) -0.0627 0.3918 0.7629 0.162 1.000 . Uiso c ?
H(11) 0.0650 0.4686 0.6903 0.128 1.000 . Uiso c ?
H(12) 0.3124 0.4719 0.7628 0.131 1.000 . Uiso c ?
H(14c) 0.3638 0.3615 0.9082 0.193 1.000 . Uiso c ?
H(14b) 0.4254 0.4335 0.8869 0.193 1.000 . Uiso c ?
H(14a) 0.3165 0.4348 0.9346 0.193 1.000 . Uiso c ?
H(15) 0.7354 0.1009 0.7091 0.145 1.000 . Uiso c ?
H(16) 0.7859 0.2362 0.7549 0.199 1.000 . Uiso c ?
H(17) 0.6858 0.3139 0.6780 0.210 1.000 . Uiso c ?
H(18) 0.6075 0.2614 0.5635 0.170 1.000 . Uiso c ?
H(20c) 0.5782 0.0663 0.5703 0.283 1.000 . Uiso c ?
H(20b) 0.5895 0.1259 0.5150 0.283 1.000 . Uiso c ?
H(20a) 0.7208 0.0846 0.5528 0.283 1.000 . Uiso c ?
H(21a) 0.1261 0.6493 0.5640 0.346 1.000 . Uiso c ?
H(21c) 0.2751 0.6181 0.5783 0.346 1.000 . Uiso c ?
H(21b) 0.2094 0.6485 0.5039 0.346 1.000 . Uiso c ?
H(22a) 0.1173 0.5378 0.5643 0.304 1.000 . Uiso c ?
H(22b) 0.0649 0.5662 0.4877 0.304 1.000 . Uiso c ?
H(23a) 0.1870 0.4908 0.4654 0.227 1.000 . Uiso c ?
H(23b) 0.2932 0.5536 0.4822 0.227 1.000 . Uiso c ?
H(24a) 0.3756 0.4355 0.5087 0.135 1.000 . Uiso c ?
H(24b) 0.4249 0.4942 0.5660 0.135 1.000 . Uiso c ?
H(25b) 0.2803 0.4497 0.6349 0.128 1.000 . Uiso c ?
H(25a) 0.2152 0.3955 0.5759 0.128 1.000 . Uiso c ?
H(26a) 0.4291 0.3388 0.5912 0.087 1.000 . Uiso c ?
H(26b) 0.4797 0.3887 0.6562 0.087 1.000 . Uiso c ?
H(30) 0.5109 0.4314 0.7519 0.072 1.000 . Uiso c ?
H(31) 0.6881 0.4906 0.8232 0.075 1.000 . Uiso c ?
H(33) 0.7993 0.3098 0.9362 0.097 1.000 . Uiso c ?
H(34) 0.6181 0.2466 0.8603 0.086 1.000 . Uiso c ?

loop_
_atom_site_aniso_label
_atom_site_aniso_U_11
_atom_site_aniso_U_22
_atom_site_aniso_U_33
_atom_site_aniso_U_12
_atom_site_aniso_U_13
_atom_site_aniso_U_23
  Ir(1)  0.0511(4)   0.1001(6)   0.0612(4)   -0.0178(3)  0.0118(3)   -0.0227(4)
  Ir(2)  0.0619(4)   0.0707(5)   0.0645(5)   -0.0204(3)  0.0149(3)   -0.0131(3)
  Mo(1)  0.0562(9)   0.091(1)    0.069(1)    0.0002(7)   0.0148(7)   -0.0159(9)
  Mo(2)  0.0512(8)   0.069(1)    0.075(1)    -0.0091(7)  0.0162(7)   -0.0099(8)
  O(1)   0.13(1)     0.31(3)     0.044(9)    0.03(2)     0.002(9)    0.00(1)
  O(2)   0.09(1)     0.13(1)     0.17(2)     -0.062(9)   0.06(1)     -0.09(1)
  O(3)   0.09(1)     0.13(1)     0.10(1)     -0.034(8)   0.004(9)    0.00(1)
  O(4)   0.18(2)     0.12(1)     0.16(2)     -0.10(1)    0.05(1)     -0.02(1)
  O(5)   0.048(7)    0.17(1)     0.08(1)     0.013(8)    -0.007(7)   0.010(9)
  O(6)   0.075(8)    0.16(1)     0.081(9)    0.000(8)    0.029(7)    0.007(9)
  O(7)   0.10(1)     0.10(1)     0.11(1)     -0.033(8)   0.032(8)    -0.061(9)
  O(8)   0.093(9)    0.08(1)     0.13(1)     -0.001(8)   0.023(8)    0.017(9)
  C(1)   0.09(1)     0.16(2)     0.08(2)     -0.03(1)    0.03(1)     -0.04(1)
  C(2)   0.07(1)     0.17(2)     0.10(2)     -0.04(1)    0.04(1)     -0.07(2)
  C(3)   0.10(2)     0.09(2)     0.08(1)     -0.02(1)    0.00(1)     -0.02(1)
  C(4)   0.11(2)     0.07(1)     0.14(2)     -0.04(1)    0.05(1)     -0.01(1)
  C(5)   0.08(1)     0.19(3)     0.07(1)     -0.02(2)    0.04(1)     -0.01(1)
  C(6)   0.09(1)     0.13(2)     0.06(1)     -0.04(1)    0.03(1)     -0.03(1)
  C(7)   0.07(1)     0.10(2)     0.10(2)     -0.02(1)    0.03(1)     -0.02(1)
  C(8)   0.07(1)     0.06(1)     0.09(1)     -0.005(9)   0.008(9)    0.01(1)
  C(9)   0.17(3)     0.15(3)     0.11(2)     0.02(2)     0.06(2)     -0.03(2)
  C(10)  0.09(2)     0.12(2)     0.20(3)     0.02(2)     0.06(2)     -0.07(2)
  C(11)  0.08(2)     0.11(2)     0.15(2)     0.02(1)     0.06(2)     0.00(2)
  C(12)  0.10(2)     0.07(2)     0.16(3)     0.01(1)     0.04(2)     -0.04(2)
  C(13)  0.18(3)     0.09(2)     0.10(2)     0.01(2)     -0.05(2)    -0.05(2)
  C(14)  0.15(3)     0.16(3)     0.17(3)     0.02(2)     0.04(2)     -0.03(2)
  C(15)  0.08(2)     0.16(3)     0.13(2)     0.07(2)     0.06(2)     0.08(2)
  C(16)  0.02(1)     0.32(6)     0.15(3)     -0.02(2)    0.02(1)     -0.10(3)
  C(17)  0.08(2)     0.09(2)     0.34(7)     -0.01(2)    -0.01(3)    0.00(3)
  C(18)  0.08(2)     0.17(4)     0.19(3)     0.02(2)     0.07(2)     0.09(3)
  C(19)  0.06(1)     0.15(2)     0.11(2)     -0.01(1)    0.04(1)     -0.04(2)
  C(20)  0.12(2)     0.37(6)     0.25(4)     -0.07(3)    0.12(3)     -0.15(4)
  C(24)  0.14(2)     0.12(2)     0.08(1)     0.01(2)     0.04(1)     0.03(1)
  C(25)  0.09(1)     0.10(2)     0.12(2)     0.00(1)     0.01(1)     0.04(1)
  C(26)  0.06(1)     0.08(1)     0.08(1)     -0.009(9)   0.016(9)    0.00(1)
  C(27)  0.06(1)     0.08(1)     0.06(1)     -0.008(8)   0.011(8)    -0.038(9)
  C(28)  0.040(8)    0.07(1)     0.06(1)     -0.004(7)   0.000(7)    0.007(8)
  C(29)  0.064(9)    0.07(1)     0.044(9)    -0.012(8)   0.001(7)    -0.005(8)
  C(30)  0.054(9)    0.06(1)     0.07(1)     -0.013(7)   0.009(7)    -0.010(8)
  C(31)  0.07(1)     0.05(1)     0.06(1)     -0.011(8)   0.005(8)    -0.002(8)
  C(32)  0.056(9)    0.04(1)     0.09(1)     -0.015(7)   0.013(9)    -0.020(9)
  C(33)  0.07(1)     0.10(2)     0.06(1)     0.00(1)     -0.004(9)   0.01(1)
  C(34)  0.06(1)     0.06(1)     0.08(1)     -0.015(8)   -0.017(9)   -0.005(9)
  C(35)  0.06(1)     0.07(1)     0.050(9)    -0.021(8)   0.006(8)    -0.010(8)
  C(36)  0.06(1)     0.06(1)     0.06(1)     -0.020(8)   0.008(8)    -0.008(8)
#------------------------------------------------------------------------------
_refine_special_details
;
  ?
;
_refine_ls_structure_factor_coef       F
_refine_ls_matrix_type                 full
_refine_ls_weighting_scheme            sigma
_refine_ls_weighting_details           'w = 1/[\s^2^(Fo) + 0.00040|Fo|^2^]'
_refine_ls_hydrogen_treatment          noref
_refine_ls_extinction_method           none
_refine_ls_extinction_coef             ?
_refine_ls_abs_structure_details       ?
_refine_ls_abs_structure_Flack         ?
_refine_ls_number_reflns               3930
_refine_ls_number_parameters           418
_refine_ls_number_restraints           0
_refine_ls_number_constraints          0
_refine_ls_R_factor_all                0.0803
_refine_ls_R_factor_gt                 0.0557
_refine_ls_wR_factor_all               0.0828
_refine_ls_wR_factor_ref               0.0756
_refine_ls_goodness_of_fit_all         1.524
_refine_ls_goodness_of_fit_ref         1.758
_refine_ls_shift/su_max               0.0014
_refine_ls_shift/su_mean              0.0002
_refine_diff_density_min               -2.31
_refine_diff_density_max               3.43
#------------------------------------------------------------------------------
_geom_special_details
;
  ?
;
loop_
_geom_bond_atom_site_label_1
_geom_bond_atom_site_label_2
_geom_bond_distance
_geom_bond_site_symmetry_1
_geom_bond_site_symmetry_2
_geom_bond_publ_flag
  Ir(1) Ir(2) 2.687(1) . . yes
  Ir(1) Mo(1) 2.837(2) . . yes
  Ir(1) Mo(2) 2.807(2) . . yes
  Ir(1) C(1) 2.01(2) . . yes
  Ir(1) C(2) 1.93(2) . . yes
  Ir(1) C(5) 2.39(2) . . yes
  Ir(1) C(7) 2.39(2) . . yes
  Ir(1) C(27) 2.09(2) . . yes
  Ir(2) Mo(1) 2.789(2) . . yes
  Ir(2) Mo(2) 2.811(2) . . yes
  Ir(2) C(3) 1.85(2) . . yes
  Ir(2) C(4) 1.91(2) . . yes
  Ir(2) C(6) 2.31(2) . . yes
  Ir(2) C(8) 2.31(2) . . yes
  Ir(2) C(28) 2.12(2) . . yes
  Mo(1) C(5) 2.05(2) . . yes
  Mo(1) C(6) 2.00(2) . . yes
  Mo(1) C(9) 2.36(2) . . yes
  Mo(1) C(10) 2.30(2) . . yes
  Mo(1) C(11) 2.37(2) . . yes
  Mo(1) C(12) 2.27(2) . . yes
  Mo(1) C(13) 2.34(2) . . yes
  Mo(1) C(27) 2.41(2) . . yes
  Mo(1) C(28) 2.35(1) . . yes
  Mo(2) C(7) 2.06(2) . . yes
  Mo(2) C(8) 1.95(2) . . yes
  Mo(2) C(15) 2.33(2) . . yes
  Mo(2) C(16) 2.28(2) . . yes
  Mo(2) C(17) 2.24(4) . . yes
  Mo(2) C(18) 2.33(2) . . yes
  Mo(2) C(19) 2.33(2) . . yes
  Mo(2) C(27) 2.31(2) . . yes
  Mo(2) C(28) 2.30(2) . . yes
  O(1) C(1) 1.05(2) . . yes
  O(2) C(2) 1.13(2) . . yes
  O(3) C(3) 1.12(2) . . yes
  O(4) C(4) 1.15(2) . . yes
  O(5) C(5) 1.14(2) . . yes
  O(6) C(6) 1.18(2) . . yes
  O(7) C(7) 1.11(2) . . yes
  O(8) C(8) 1.15(2) . . yes
  C(9) C(10) 1.47(4) . . yes
  C(9) C(13) 1.43(4) . . yes
  C(9) H(9) 0.95 . . no
  C(10) C(11) 1.38(4) . . yes
  C(10) H(10) 0.95 . . no
  C(11) C(12) 1.43(3) . . yes
  C(11) H(11) 0.95 . . no
  C(12) C(13) 1.38(4) . . yes
  C(12) H(12) 0.95 . . no
  C(13) C(14) 1.24(4) . . yes
  C(14) H(14c) 0.95 . . no
  C(14) H(14b) 0.95 . . no
  C(14) H(14a) 0.95 . . no
  C(15) C(16) 1.51(5) . . yes
  C(15) C(19) 1.34(3) . . yes
  C(15) H(15) 0.95 . . no
  C(16) C(17) 1.11(5) . . yes
  C(16) H(16) 0.95 . . no
  C(17) C(18) 1.28(5) . . yes
  C(17) H(17) 0.95 . . no
  C(18) C(19) 1.41(4) . . yes
  C(18) H(18) 0.95 . . no
  C(19) C(20) 1.53(4) . . yes
  C(20) H(20c) 0.95 . . no
  C(20) H(20b) 0.95 . . no
  C(20) H(20a) 0.95 . . no
  C(21) C(22) 1.26(7) . . yes
  C(21) H(21a) 0.95 . . no
  C(21) H(21c) 0.95 . . no
  C(21) H(21b) 0.95 . . no
  C(22) C(23) 1.36(5) . . yes
  C(22) H(22a) 0.95 . . no
  C(22) H(22b) 0.95 . . no
  C(23) C(24) 1.53(4) . . yes
  C(23) H(23a) 0.95 . . no
  C(23) H(23b) 0.95 . . no
  C(24) C(25) 1.54(3) . . yes
  C(24) H(24a) 0.95 . . no
  C(24) H(24b) 0.95 . . no
  C(25) C(26) 1.50(3) . . yes
  C(25) H(25b) 0.95 . . no
  C(25) H(25a) 0.95 . . no
  C(26) C(27) 1.54(2) . . yes
  C(26) H(26a) 0.95 . . no
  C(26) H(26b) 0.95 . . no
  C(27) C(28) 1.43(2) . . yes
  C(28) C(29) 1.53(2) . . yes
  C(29) C(30) 1.37(2) . . yes
  C(29) C(34) 1.40(2) . . yes
  C(30) C(31) 1.36(2) . . yes
  C(30) H(30) 0.95 . . no
  C(31) C(32) 1.39(2) . . yes
  C(31) H(31) 0.95 . . no
  C(32) C(33) 1.38(2) . . yes
  C(32) C(35) 1.42(2) . . yes
  C(33) C(34) 1.43(2) . . yes
  C(33) H(33) 0.95 . . no
  C(34) H(34) 0.95 . . no
  C(35) C(36) 1.19(2) . . yes
  C(36) C(36) 1.40(3) . 3_767 yes
#------------------------------------------------------------------------------
loop_
_geom_angle_atom_site_label_1
_geom_angle_atom_site_label_2
_geom_angle_atom_site_label_3
_geom_angle
_geom_angle_site_symmetry_1
_geom_angle_site_symmetry_2
_geom_angle_site_symmetry_3
_geom_angle_publ_flag
  Ir(2) Ir(1)  Mo(1) 60.59(4) . . . yes
  Ir(2) Ir(1)  Mo(2) 61.51(4) . . . yes
  Ir(2) Ir(1)  C(1) 170.5(6) . . . yes
  Ir(2) Ir(1)  C(2) 93.7(7) . . . yes
  Ir(2) Ir(1)  C(5) 98.4(5) . . . yes
  Ir(2) Ir(1)  C(7) 88.9(5) . . . yes
  Ir(2) Ir(1)  C(27) 73.4(5) . . . yes
  Mo(1) Ir(1)  Mo(2) 96.80(5) . . . yes
  Mo(1) Ir(1)  C(1) 118.1(7) . . . yes
  Mo(1) Ir(1)  C(2) 112.8(5) . . . yes
  Mo(1) Ir(1)  C(5) 45.2(6) . . . yes
  Mo(1) Ir(1)  C(7) 141.8(5) . . . yes
  Mo(1) Ir(1)  C(27) 56.1(4) . . . yes
  Mo(2) Ir(1)  C(1) 110.3(6) . . . yes
  Mo(2) Ir(1)  C(2) 125.2(8) . . . yes
  Mo(2) Ir(1)  C(5) 140.0(6) . . . yes
  Mo(2) Ir(1)  C(7) 45.9(5) . . . yes
  Mo(2) Ir(1)  C(27) 53.9(5) . . . yes
  C(1) Ir(1)  C(2) 95.3(9) . . . yes
  C(1) Ir(1)  C(5) 85.1(8) . . . yes
  C(1) Ir(1)  C(7) 88.1(8) . . . yes
  C(1) Ir(1)  C(27) 97.9(8) . . . yes
  C(2) Ir(1)  C(5) 87.8(9) . . . yes
  C(2) Ir(1)  C(7) 89.9(8) . . . yes
  C(2) Ir(1)  C(27) 165.9(8) . . . yes
  C(5) Ir(1)  C(7) 172.5(8) . . . yes
  C(5) Ir(1)  C(27) 88.4(7) . . . yes
  C(7) Ir(1)  C(27) 95.5(6) . . . yes
  Ir(1) Ir(2)  Mo(1) 62.37(4) . . . yes
  Ir(1) Ir(2)  Mo(2) 61.35(4) . . . yes
  Ir(1) Ir(2)  C(3) 167.3(7) . . . yes
  Ir(1) Ir(2)  C(4) 97.7(7) . . . yes
  Ir(1) Ir(2)  C(6) 82.2(5) . . . yes
  Ir(1) Ir(2)  C(8) 92.9(5) . . . yes
  Ir(1) Ir(2)  C(28) 71.8(4) . . . yes
  Mo(1) Ir(2)  Mo(2) 97.81(5) . . . yes
  Mo(1) Ir(2)  C(3) 105.1(7) . . . yes
  Mo(1) Ir(2)  C(4) 125.1(7) . . . yes
  Mo(1) Ir(2)  C(6) 45.1(6) . . . yes
  Mo(1) Ir(2)  C(8) 141.2(5) . . . yes
  Mo(1) Ir(2)  C(28) 55.3(4) . . . yes
  Mo(2) Ir(2)  C(3) 122.4(7) . . . yes
  Mo(2) Ir(2)  C(4) 117.1(6) . . . yes
  Mo(2) Ir(2)  C(6) 138.9(5) . . . yes
  Mo(2) Ir(2)  C(8) 43.5(5) . . . yes
  Mo(2) Ir(2)  C(28) 53.5(4) . . . yes
  C(3) Ir(2)  C(4) 91(1) . . . yes
  C(3) Ir(2)  C(6) 89.6(8) . . . yes
  C(3) Ir(2)  C(8) 97.0(9) . . . yes
  C(3) Ir(2)  C(28) 100.3(8) . . . yes
  C(4) Ir(2)  C(6) 84.1(8) . . . yes
  C(4) Ir(2)  C(8) 85.2(8) . . . yes
  C(4) Ir(2)  C(28) 168.2(8) . . . yes
  C(6) Ir(2)  C(8) 167.5(7) . . . yes
  C(6) Ir(2)  C(28) 99.4(7) . . . yes
  C(8) Ir(2)  C(28) 89.9(6) . . . yes
  Ir(1) Mo(1)  Ir(2) 57.05(4) . . . yes
  Ir(1) Mo(1)  C(5) 55.9(7) . . . yes
  Ir(1) Mo(1)  C(6) 83.9(6) . . . yes
  Ir(1) Mo(1)  C(9) 157.1(9) . . . yes
  Ir(1) Mo(1)  C(10) 136.8(8) . . . yes
  Ir(1) Mo(1)  C(11) 128.7(6) . . . yes
  Ir(1) Mo(1)  C(12) 143.0(7) . . . yes
  Ir(1) Mo(1)  C(13) 164(1) . . . yes
  Ir(1) Mo(1)  C(27) 46.0(4) . . . yes
  Ir(1) Mo(1)  C(28) 65.9(4) . . . yes
  Ir(2) Mo(1)  C(5) 104.3(8) . . . yes
  Ir(2) Mo(1)  C(6) 54.6(6) . . . yes
  Ir(2) Mo(1)  C(9) 114.4(8) . . . yes
  Ir(2) Mo(1)  C(10) 144(1) . . . yes
  Ir(2) Mo(1)  C(11) 174.1(7) . . . yes
  Ir(2) Mo(1)  C(12) 139.3(8) . . . yes
  Ir(2) Mo(1)  C(13) 113.8(8) . . . yes
  Ir(2) Mo(1)  C(27) 67.2(4) . . . yes
  Ir(2) Mo(1)  C(28) 47.7(4) . . . yes
  C(5) Mo(1)  C(6) 87.7(8) . . . yes
  C(5) Mo(1)  C(9) 113(1) . . . yes
  C(5) Mo(1)  C(10) 81(1) . . . yes
  C(5) Mo(1)  C(11) 81(1) . . . yes
  C(5) Mo(1)  C(12) 115(1) . . . yes
  C(5) Mo(1)  C(13) 139(1) . . . yes
  C(5) Mo(1)  C(27) 88.8(7) . . . yes
  C(5) Mo(1)  C(28) 119.7(7) . . . yes
  C(6) Mo(1)  C(9) 75(1) . . . yes
  C(6) Mo(1)  C(10) 90(1) . . . yes
  C(6) Mo(1)  C(11) 124.6(8) . . . yes
  C(6) Mo(1)  C(12) 133.1(9) . . . yes
  C(6) Mo(1)  C(13) 101(1) . . . yes
  C(6) Mo(1)  C(27) 118.5(8) . . . yes
  C(6) Mo(1)  C(28) 101.3(7) . . . yes
  C(9) Mo(1)  C(10) 37(1) . . . yes
  C(9) Mo(1)  C(11) 61(1) . . . yes
  C(9) Mo(1)  C(12) 59(1) . . . yes
  C(9) Mo(1)  C(13) 36(1) . . . yes
  C(9) Mo(1)  C(27) 155(1) . . . yes
  C(9) Mo(1)  C(28) 127(1) . . . yes
  C(10) Mo(1)  C(11) 34.4(9) . . . yes
  C(10) Mo(1)  C(12) 56.9(8) . . . yes
  C(10) Mo(1)  C(13) 59(1) . . . yes
  C(10) Mo(1)  C(27) 149(1) . . . yes
  C(10) Mo(1)  C(28) 156.1(8) . . . yes
  C(11) Mo(1)  C(12) 35.9(8) . . . yes
  C(11) Mo(1)  C(13) 60(1) . . . yes
  C(11) Mo(1)  C(27) 115.3(7) . . . yes
  C(11) Mo(1)  C(28) 131.2(7) . . . yes
  C(12) Mo(1)  C(13) 34.8(9) . . . yes
  C(12) Mo(1)  C(27) 103.1(7) . . . yes
  C(12) Mo(1)  C(28) 101.0(7) . . . yes
  C(13) Mo(1)  C(27) 120(1) . . . yes
  C(13) Mo(1)  C(28) 98(1) . . . yes
  C(27) Mo(1)  C(28) 35.0(5) . . . yes
  Ir(1) Mo(2)  Ir(2) 57.15(3) . . . yes
  Ir(1) Mo(2)  C(7) 56.3(5) . . . yes
  Ir(1) Mo(2)  C(8) 97.8(5) . . . yes
  Ir(1) Mo(2)  C(15) 157(1) . . . yes
  Ir(1) Mo(2)  C(16) 161(2) . . . yes
  Ir(1) Mo(2)  C(17) 134(1) . . . yes
  Ir(1) Mo(2)  C(18) 118.8(8) . . . yes
  Ir(1) Mo(2)  C(19) 129.5(7) . . . yes
  Ir(1) Mo(2)  C(27) 46.9(4) . . . yes
  Ir(1) Mo(2)  C(28) 67.1(3) . . . yes
  Ir(2) Mo(2)  C(7) 92.6(5) . . . yes
  Ir(2) Mo(2)  C(8) 54.4(5) . . . yes
  Ir(2) Mo(2)  C(15) 131.4(6) . . . yes
  Ir(2) Mo(2)  C(16) 127.4(8) . . . yes
  Ir(2) Mo(2)  C(17) 139(2) . . . yes
  Ir(2) Mo(2)  C(18) 166(1) . . . yes
  Ir(2) Mo(2)  C(19) 158.2(9) . . . yes
  Ir(2) Mo(2)  C(27) 68.0(4) . . . yes
  Ir(2) Mo(2)  C(28) 47.6(4) . . . yes
  C(7) Mo(2)  C(8) 87.3(8) . . . yes
  C(7) Mo(2)  C(15) 100(1) . . . yes
  C(7) Mo(2)  C(16) 134(1) . . . yes
  C(7) Mo(2)  C(17) 127(2) . . . yes
  C(7) Mo(2)  C(18) 95(1) . . . yes
  C(7) Mo(2)  C(19) 79.8(7) . . . yes
  C(7) Mo(2)  C(27) 98.7(7) . . . yes
  C(7) Mo(2)  C(28) 123.0(6) . . . yes
  C(8) Mo(2)  C(15) 79.4(8) . . . yes
  C(8) Mo(2)  C(16) 98(2) . . . yes
  C(8) Mo(2)  C(17) 127(1) . . . yes
  C(8) Mo(2)  C(18) 137(1) . . . yes
  C(8) Mo(2)  C(19) 104(1) . . . yes
  C(8) Mo(2)  C(27) 122.4(7) . . . yes
  C(8) Mo(2)  C(28) 94.3(7) . . . yes
  C(15) Mo(2)  C(16) 38(1) . . . yes
  C(15) Mo(2)  C(17) 58(1) . . . yes
  C(15) Mo(2)  C(18) 58.2(9) . . . yes
  C(15) Mo(2)  C(19) 33.3(8) . . . yes
  C(15) Mo(2)  C(27) 151.8(9) . . . yes
  C(15) Mo(2)  C(28) 136(1) . . . yes
  C(16) Mo(2)  C(17) 29(1) . . . yes
  C(16) Mo(2)  C(18) 52(1) . . . yes
  C(16) Mo(2)  C(19) 55(1) . . . yes
  C(16) Mo(2)  C(27) 115(2) . . . yes
  C(16) Mo(2)  C(28) 102(1) . . . yes
  C(17) Mo(2)  C(18) 33(1) . . . yes
  C(17) Mo(2)  C(19) 56(1) . . . yes
  C(17) Mo(2)  C(27) 94(1) . . . yes
  C(17) Mo(2)  C(28) 96(1) . . . yes
  C(18) Mo(2)  C(19) 35(1) . . . yes
  C(18) Mo(2)  C(27) 99(1) . . . yes
  C(18) Mo(2)  C(28) 119(1) . . . yes
  C(19) Mo(2)  C(27) 133(1) . . . yes
  C(19) Mo(2)  C(28) 151.4(8) . . . yes
  C(27) Mo(2)  C(28) 36.2(5) . . . yes
  Ir(1) C(1)  O(1) 169(3) . . . yes
  Ir(1) C(2)  O(2) 176(3) . . . yes
  Ir(2) C(3)  O(3) 176(2) . . . yes
  Ir(2) C(4)  O(4) 179(2) . . . yes
  Ir(1) C(5)  Mo(1) 78.9(8) . . . yes
  Ir(1) C(5)  O(5) 125(2) . . . yes
  Mo(1) C(5)  O(5) 156(2) . . . yes
  Ir(2) C(6)  Mo(1) 80.3(6) . . . yes
  Ir(2) C(6)  O(6) 127(2) . . . yes
  Mo(1) C(6)  O(6) 152(2) . . . yes
  Ir(1) C(7)  Mo(2) 77.8(7) . . . yes
  Ir(1) C(7)  O(7) 124(2) . . . yes
  Mo(2) C(7)  O(7) 158(2) . . . yes
  Ir(2) C(8)  Mo(2) 82.0(7) . . . yes
  Ir(2) C(8)  O(8) 125(2) . . . yes
  Mo(2) C(8)  O(8) 153(2) . . . yes
  Mo(1) C(9)  C(10) 69(1) . . . yes
  Mo(1) C(9)  C(13) 72(1) . . . yes
  Mo(1) C(9)  H(9) 122.4 . . . no
  C(10) C(9)  C(13) 103(3) . . . yes
  C(10) C(9)  H(9) 128.4 . . . no
  C(13) C(9)  H(9) 128.3 . . . no
  Mo(1) C(10)  C(9) 74(1) . . . yes
  Mo(1) C(10)  C(11) 75(1) . . . yes
  Mo(1) C(10)  H(10) 119.1 . . . no
  C(9) C(10)  C(11) 114(2) . . . yes
  C(9) C(10)  H(10) 123.0 . . . no
  C(11) C(10)  H(10) 123.0 . . . no
  Mo(1) C(11)  C(10) 70(1) . . . yes
  Mo(1) C(11)  C(12) 68(1) . . . yes
  Mo(1) C(11)  H(11) 124.0 . . . no
  C(10) C(11)  C(12) 101(2) . . . yes
  C(10) C(11)  H(11) 129.4 . . . no
  C(12) C(11)  H(11) 129.4 . . . no
  Mo(1) C(12)  C(11) 76(1) . . . yes
  Mo(1) C(12)  C(13) 75(1) . . . yes
  Mo(1) C(12)  H(12) 117.4 . . . no
  C(11) C(12)  C(13) 114(3) . . . yes
  C(11) C(12)  H(12) 122.8 . . . no
  C(13) C(12)  H(12) 122.9 . . . no
  Mo(1) C(13)  C(9) 73(1) . . . yes
  Mo(1) C(13)  C(12) 70(1) . . . yes
  Mo(1) C(13)  C(14) 127(2) . . . yes
  C(9) C(13)  C(12) 107(3) . . . yes
  C(9) C(13)  C(14) 119(4) . . . yes
  C(12) C(13)  C(14) 134(4) . . . yes
  C(13) C(14)  H(14c) 109.5 . . . no
  C(13) C(14)  H(14b) 109.5 . . . no
  C(13) C(14)  H(14a) 109.5 . . . no
  H(14c) C(14)  H(14b) 109.5 . . . no
  H(14c) C(14)  H(14a) 109.5 . . . no
  H(14b) C(14)  H(14a) 109.5 . . . no
  Mo(2) C(15)  C(16) 69(1) . . . yes
  Mo(2) C(15)  C(19) 73(1) . . . yes
  Mo(2) C(15)  H(15) 118.7 . . . no
  C(16) C(15)  C(19) 96(2) . . . yes
  C(16) C(15)  H(15) 132.0 . . . no
  C(19) C(15)  H(15) 132.0 . . . no
  Mo(2) C(16)  C(15) 73(1) . . . yes
  Mo(2) C(16)  C(17) 74(2) . . . yes
  Mo(2) C(16)  H(16) 121.9 . . . no
  C(15) C(16)  C(17) 114(4) . . . yes
  C(15) C(16)  H(16) 122.9 . . . no
  C(17) C(16)  H(16) 122.9 . . . no
  Mo(2) C(17)  C(16) 78(3) . . . yes
  Mo(2) C(17)  C(18) 78(2) . . . yes
  Mo(2) C(17)  H(17) 113.1 . . . no
  C(16) C(17)  C(18) 114(5) . . . yes
  C(16) C(17)  H(17) 123.0 . . . no
  C(18) C(17)  H(17) 123.0 . . . no
  Mo(2) C(18)  C(17) 70(2) . . . yes
  Mo(2) C(18)  C(19) 72(1) . . . yes
  Mo(2) C(18)  H(18) 122.0 . . . no
  C(17) C(18)  C(19) 104(3) . . . yes
  C(17) C(18)  H(18) 127.9 . . . no
  C(19) C(18)  H(18) 127.9 . . . no
  Mo(2) C(19)  C(15) 73(1) . . . yes
  Mo(2) C(19)  C(18) 72(1) . . . yes
  Mo(2) C(19)  C(20) 128(2) . . . yes
  C(15) C(19)  C(18) 111(3) . . . yes
  C(15) C(19)  C(20) 123(4) . . . yes
  C(18) C(19)  C(20) 125(4) . . . yes
  C(19) C(20)  H(20c) 109.5 . . . no
  C(19) C(20)  H(20b) 109.5 . . . no
  C(19) C(20)  H(20a) 109.5 . . . no
  H(20c) C(20)  H(20b) 109.5 . . . no
  H(20c) C(20)  H(20a) 109.5 . . . no
  H(20b) C(20)  H(20a) 109.5 . . . no
  C(22) C(21)  H(21a) 109.5 . . . no
  C(22) C(21)  H(21c) 109.5 . . . no
  C(22) C(21)  H(21b) 109.5 . . . no
  H(21a) C(21)  H(21c) 109.5 . . . no
  H(21a) C(21)  H(21b) 109.5 . . . no
  H(21c) C(21)  H(21b) 109.5 . . . no
  C(21) C(22)  C(23) 111(6) . . . yes
  C(21) C(22)  H(22a) 109.1 . . . no
  C(21) C(22)  H(22b) 109.1 . . . no
  C(23) C(22)  H(22a) 109.1 . . . no
  C(23) C(22)  H(22b) 109.1 . . . no
  H(22a) C(22)  H(22b) 109.5 . . . no
  C(22) C(23)  C(24) 131(4) . . . yes
  C(22) C(23)  H(23a) 103.9 . . . no
  C(22) C(23)  H(23b) 103.9 . . . no
  C(24) C(23)  H(23a) 103.9 . . . no
  C(24) C(23)  H(23b) 103.9 . . . no
  H(23a) C(23)  H(23b) 109.5 . . . no
  C(23) C(24)  C(25) 115(2) . . . yes
  C(23) C(24)  H(24a) 108.0 . . . no
  C(23) C(24)  H(24b) 108.0 . . . no
  C(25) C(24)  H(24a) 108.0 . . . no
  C(25) C(24)  H(24b) 108.0 . . . no
  H(24a) C(24)  H(24b) 109.5 . . . no
  C(24) C(25)  C(26) 113(2) . . . yes
  C(24) C(25)  H(25b) 108.6 . . . no
  C(24) C(25)  H(25a) 108.6 . . . no
  C(26) C(25)  H(25b) 108.6 . . . no
  C(26) C(25)  H(25a) 108.6 . . . no
  H(25b) C(25)  H(25a) 109.5 . . . no
  C(25) C(26)  C(27) 121(2) . . . yes
  C(25) C(26)  H(26a) 106.4 . . . no
  C(25) C(26)  H(26b) 106.4 . . . no
  C(27) C(26)  H(26a) 106.4 . . . no
  C(27) C(26)  H(26b) 106.4 . . . no
  H(26a) C(26)  H(26b) 109.5 . . . no
  Ir(1) C(27)  Mo(1) 77.9(5) . . . yes
  Ir(1) C(27)  Mo(2) 79.2(5) . . . yes
  Ir(1) C(27)  C(26) 123(1) . . . yes
  Ir(1) C(27)  C(28) 107(1) . . . yes
  Mo(1) C(27)  Mo(2) 126.9(8) . . . yes
  Mo(1) C(27)  C(26) 119(1) . . . yes
  Mo(1) C(27)  C(28) 70.5(9) . . . yes
  Mo(2) C(27)  C(26) 114(1) . . . yes
  Mo(2) C(27)  C(28) 72(1) . . . yes
  C(26) C(27)  C(28) 130(1) . . . yes
  Ir(2) C(28)  Mo(1) 77.0(5) . . . yes
  Ir(2) C(28)  Mo(2) 78.9(5) . . . yes
  Ir(2) C(28)  C(27) 108(1) . . . yes
  Ir(2) C(28)  C(29) 127(1) . . . yes
  Mo(1) C(28)  Mo(2) 130.0(7) . . . yes
  Mo(1) C(28)  C(27) 74.5(8) . . . yes
  Mo(1) C(28)  C(29) 116(1) . . . yes
  Mo(2) C(28)  C(27) 72.2(9) . . . yes
  Mo(2) C(28)  C(29) 113(1) . . . yes
  C(27) C(28)  C(29) 125(1) . . . yes
  C(28) C(29)  C(30) 125(1) . . . yes
  C(28) C(29)  C(34) 117(1) . . . yes
  C(30) C(29)  C(34) 117(1) . . . yes
  C(29) C(30)  C(31) 122(2) . . . yes
  C(29) C(30)  H(30) 119.0 . . . no
  C(31) C(30)  H(30) 119.0 . . . no
  C(30) C(31)  C(32) 123(1) . . . yes
  C(30) C(31)  H(31) 118.4 . . . no
  C(32) C(31)  H(31) 118.4 . . . no
  C(31) C(32)  C(33) 116(1) . . . yes
  C(31) C(32)  C(35) 124(2) . . . yes
  C(33) C(32)  C(35) 119(2) . . . yes
  C(32) C(33)  C(34) 121(2) . . . yes
  C(32) C(33)  H(33) 119.5 . . . no
  C(34) C(33)  H(33) 119.5 . . . no
  C(29) C(34)  C(33) 120(2) . . . yes
  C(29) C(34)  H(34) 120.0 . . . no
  C(33) C(34)  H(34) 120.0 . . . no
  C(32) C(35)  C(36) 176(2) . . . yes
  C(35) C(36)  C(36) 177(2) . . 3_767 yes
#------------------------------------------------------------------------------
loop_
_geom_contact_atom_site_label_1
_geom_contact_atom_site_label_2
_geom_contact_distance
_geom_contact_site_symmetry_1
_geom_contact_site_symmetry_2
_geom_contact_publ_flag
  O(1)      O(6)      3.12(2)    . 4_554 no
  O(1)      O(3)      3.34(3)    . 4_554 no
  O(2)      C(15)     3.24(2)    . 1_455 no
  O(2)      C(36)     3.27(2)    . 2_646 no
  O(2)      C(36)     3.42(2)    . 4_454 no
  O(2)      C(19)     3.50(3)    . 1_455 no
  O(4)      C(11)     3.33(3)    . 2_546 no
  O(4)      C(10)     3.53(4)    . 2_546 no
  O(5)      C(17)     3.00(4)    . 1_455 no
  O(5)      C(18)     3.31(4)    . 1_455 no
  O(5)      C(21)     3.40(6)    . 3_566 no
  O(5)      C(16)     3.40(5)    . 1_455 no
  O(5)      C(22)     3.57(5)    . 3_566 no
  O(6)      C(16)     3.33(3)    . 1_455 no
  O(7)      C(31)     3.38(2)    . 2_646 no
  O(7)      C(14)     3.42(4)    . 4_554 no
  O(7)      C(35)     3.42(2)    . 2_646 no
  O(7)      C(36)     3.56(2)    . 2_646 no
  O(8)      C(30)     3.43(2)    . 2_646 no
  O(8)      C(12)     3.50(3)    . 2_646 no
  C(9)      C(35)     3.53(3)    . 1_455 no
  C(22)     C(22)     3.6(1)     . 3_566 no
  Ir(1)     C(2)      1.93(2)    . . no
  Ir(1)     C(1)      2.01(2)    . . no
  Ir(1)     C(7)      2.39(2)    . . no
  Ir(1)     C(5)      2.39(2)    . . no
  Ir(1)     C(6)      3.29(2)    . . no
  Ir(1)     C(4)      3.50(2)    . . no
  Ir(2)     C(3)      1.85(2)    . . no
  Ir(2)     C(4)      1.91(2)    . . no
  Ir(2)     C(6)      2.31(2)    . . no
  Ir(2)     C(8)      2.31(2)    . . no
  Ir(2)     C(2)      3.41(2)    . . no
  Ir(2)     C(7)      3.56(2)    . . no
  Mo(1)     C(6)      2.00(2)    . . no
  Mo(1)     C(5)      2.05(2)    . . no
  Mo(2)     C(8)      1.95(2)    . . no
  Mo(2)     C(7)      2.06(2)    . . no
#------------------------------------------------------------------------------
loop_
_geom_torsion_atom_site_label_1
_geom_torsion_atom_site_label_2
_geom_torsion_atom_site_label_3
_geom_torsion_atom_site_label_4
_geom_torsion_site_symmetry_1
_geom_torsion_site_symmetry_2
_geom_torsion_site_symmetry_3
_geom_torsion_site_symmetry_4
_geom_torsion
_geom_torsion_publ_flag
  Ir(1) Ir(2) Mo(1) C(5) . . . . 31.2(5) no
  Ir(1) Ir(2) Mo(1) C(6) . . . . 107.8(6) no
  Ir(1) Ir(2) Mo(1) C(9) . . . . 156(1) no
  Ir(1) Ir(2) Mo(1) C(10) . . . . 126(1) no
  Ir(1) Ir(2) Mo(1) C(11) . . . . -168(6) no
  Ir(1) Ir(2) Mo(1) C(12) . . . . -135(1) no
  Ir(1) Ir(2) Mo(1) C(13) . . . . -165(1) no
  Ir(1) Ir(2) Mo(1) C(27) . . . . -51.2(4) no
  Ir(1) Ir(2) Mo(1) C(28) . . . . -86.2(5) no
  Ir(1) Ir(2) Mo(2) C(7) . . . . -46.4(6) no
  Ir(1) Ir(2) Mo(2) C(8) . . . . -131.3(7) no
  Ir(1) Ir(2) Mo(2) C(15) . . . . -152(2) no
  Ir(1) Ir(2) Mo(2) C(16) . . . . 158(2) no
  Ir(1) Ir(2) Mo(2) C(17) . . . . 121(2) no
  Ir(1) Ir(2) Mo(2) C(18) . . . . 77(4) no
  Ir(1) Ir(2) Mo(2) C(19) . . . . -115(2) no
  Ir(1) Ir(2) Mo(2) C(27) . . . . 51.9(4) no
  Ir(1) Ir(2) Mo(2) C(28) . . . . 87.8(5) no
  Ir(1) Ir(2) C(3) O(3) . . . . 76.6(3) no
  Ir(1) Ir(2) C(4) O(4) . . . . -81.5908 no
  Ir(1) Ir(2) C(6) Mo(1) . . . . -58.4(4) no
  Ir(1) Ir(2) C(6) O(6) . . . . 119(2) no
  Ir(1) Ir(2) C(8) Mo(2) . . . . 41.3(5) no
  Ir(1) Ir(2) C(8) O(8) . . . . -139(2) no
  Ir(1) Ir(2) C(28) Mo(1) . . . . 68.5(3) no
  Ir(1) Ir(2) C(28) Mo(2) . . . . -67.4(3) no
  Ir(1) Ir(2) C(28) C(27) . . . . -0.3(9) no
  Ir(1) Ir(2) C(28) C(29) . . . . -178(1) no
  Ir(1) Mo(1) Ir(2) Mo(2) . . . . 51.83(4) no
  Ir(1) Mo(1) Ir(2) C(3) . . . . 178.4(7) no
  Ir(1) Mo(1) Ir(2) C(4) . . . . -79.4(8) no
  Ir(1) Mo(1) Ir(2) C(6) . . . . -107.8(6) no
  Ir(1) Mo(1) Ir(2) C(8) . . . . 56.0(7) no
  Ir(1) Mo(1) Ir(2) C(28) . . . . 86.2(5) no
  Ir(1) Mo(1) C(5) O(5) . . . . -167(5) no
  Ir(1) Mo(1) C(6) Ir(2) . . . . 53.5(3) no
  Ir(1) Mo(1) C(6) O(6) . . . . -123(3) no
  Ir(1) Mo(1) C(9) C(10) . . . . -88(3) no
  Ir(1) Mo(1) C(9) C(13) . . . . 160(2) no
  Ir(1) Mo(1) C(10) C(9) . . . . 145(2) no
  Ir(1) Mo(1) C(10) C(11) . . . . -94(2) no
  Ir(1) Mo(1) C(11) C(10) . . . . 119(2) no
  Ir(1) Mo(1) C(11) C(12) . . . . -130(1) no
  Ir(1) Mo(1) C(12) C(11) . . . . 87(1) no
  Ir(1) Mo(1) C(12) C(13) . . . . -153(2) no
  Ir(1) Mo(1) C(13) C(9) . . . . -151(3) no
  Ir(1) Mo(1) C(13) C(12) . . . . 93(3) no
  Ir(1) Mo(1) C(13) C(14) . . . . -37(7) no
  Ir(1) Mo(1) C(27) Mo(2) . . . . -66.4(7) no
  Ir(1) Mo(1) C(27) C(26) . . . . 121(1) no
  Ir(1) Mo(1) C(27) C(28) . . . . -113(1) no
  Ir(1) Mo(1) C(28) Ir(2) . . . . -66.5(3) no
  Ir(1) Mo(1) C(28) Mo(2) . . . . -3.4(7) no
  Ir(1) Mo(1) C(28) C(27) . . . . 46.4(8) no
  Ir(1) Mo(1) C(28) C(29) . . . . 168(1) no
  Ir(1) Mo(2) Ir(2) Mo(1) . . . . -52.53(4) no
  Ir(1) Mo(2) Ir(2) C(3) . . . . -165.9(8) no
  Ir(1) Mo(2) Ir(2) C(4) . . . . 83.8(8) no
  Ir(1) Mo(2) Ir(2) C(6) . . . . -30.5(7) no
  Ir(1) Mo(2) Ir(2) C(8) . . . . 131.3(7) no
  Ir(1) Mo(2) Ir(2) C(28) . . . . -87.8(5) no
  Ir(1) Mo(2) C(7) O(7) . . . . 180(5) no
  Ir(1) Mo(2) C(8) Ir(2) . . . . -39.6(4) no
  Ir(1) Mo(2) C(8) O(8) . . . . 140(4) no
  Ir(1) Mo(2) C(15) C(16) . . . . 157(2) no
  Ir(1) Mo(2) C(15) C(19) . . . . 53(3) no
  Ir(1) Mo(2) C(16) C(15) . . . . -151(2) no
  Ir(1) Mo(2) C(16) C(17) . . . . -28(5) no
  Ir(1) Mo(2) C(17) C(16) . . . . 168(3) no
  Ir(1) Mo(2) C(17) C(18) . . . . -74(3) no
  Ir(1) Mo(2) C(18) C(17) . . . . 128(2) no
  Ir(1) Mo(2) C(18) C(19) . . . . -119(2) no
  Ir(1) Mo(2) C(19) C(15) . . . . -156(2) no
  Ir(1) Mo(2) C(19) C(18) . . . . 85(2) no
  Ir(1) Mo(2) C(19) C(20) . . . . -36(4) no
  Ir(1) Mo(2) C(27) Mo(1) . . . . 65.8(7) no
  Ir(1) Mo(2) C(27) C(26) . . . . -122(1) no
  Ir(1) Mo(2) C(27) C(28) . . . . 112(1) no
  Ir(1) Mo(2) C(28) Ir(2) . . . . 65.7(3) no
  Ir(1) Mo(2) C(28) Mo(1) . . . . 3.4(7) no
  Ir(1) Mo(2) C(28) C(27) . . . . -47.2(8) no
  Ir(1) Mo(2) C(28) C(29) . . . . -169(1) no
  Ir(1) C(5) Mo(1) Ir(2) . . . . -31.7(5) no
  Ir(1) C(5) Mo(1) C(6) . . . . -84.2(8) no
  Ir(1) C(5) Mo(1) C(9) . . . . -156.8(9) no
  Ir(1) C(5) Mo(1) C(10) . . . . -175(1) no
  Ir(1) C(5) Mo(1) C(11) . . . . 150.3(7) no
  Ir(1) C(5) Mo(1) C(12) . . . . 138.3(7) no
  Ir(1) C(5) Mo(1) C(13) . . . . 171(2) no
  Ir(1) C(5) Mo(1) C(27) . . . . 34.4(6) no
  Ir(1) C(5) Mo(1) C(28) . . . . 17.5(9) no
  Ir(1) C(7) Mo(2) Ir(2) . . . . 47.0(4) no
  Ir(1) C(7) Mo(2) C(8) . . . . 101.2(7) no
  Ir(1) C(7) Mo(2) C(15) . . . . 179.9(6) no
  Ir(1) C(7) Mo(2) C(16) . . . . -160(2) no
  Ir(1) C(7) Mo(2) C(17) . . . . -123(1) no
  Ir(1) C(7) Mo(2) C(18) . . . . -121.6(9) no
  Ir(1) C(7) Mo(2) C(19) . . . . -154(1) no
  Ir(1) C(7) Mo(2) C(27) . . . . -21.2(6) no
  Ir(1) C(7) Mo(2) C(28) . . . . 7.8(9) no
  Ir(1) C(27) Mo(1) Ir(2) . . . . 65.5(4) no
  Ir(1) C(27) Mo(1) C(5) . . . . -40.6(9) no
  Ir(1) C(27) Mo(1) C(6) . . . . 46.1(8) no
  Ir(1) C(27) Mo(1) C(9) . . . . 165(2) no
  Ir(1) C(27) Mo(1) C(10) . . . . -111(2) no
  Ir(1) C(27) Mo(1) C(11) . . . . -120.3(8) no
  Ir(1) C(27) Mo(1) C(12) . . . . -156.2(9) no
  Ir(1) C(27) Mo(1) C(13) . . . . 170.8(9) no
  Ir(1) C(27) Mo(1) C(28) . . . . 113(1) no
  Ir(1) C(27) Mo(2) Ir(2) . . . . -64.9(4) no
  Ir(1) C(27) Mo(2) C(7) . . . . 24.4(7) no
  Ir(1) C(27) Mo(2) C(8) . . . . -68.0(8) no
  Ir(1) C(27) Mo(2) C(15) . . . . 156(2) no
  Ir(1) C(27) Mo(2) C(16) . . . . 173(1) no
  Ir(1) C(27) Mo(2) C(17) . . . . 153(2) no
  Ir(1) C(27) Mo(2) C(18) . . . . 121(1) no
  Ir(1) C(27) Mo(2) C(19) . . . . 108.5(9) no
  Ir(1) C(27) Mo(2) C(28) . . . . -112(1) no
  Ir(1) C(27) C(26) C(25) . . . . 65(2) no
  Ir(1) C(27) C(28) Ir(2) . . . . 0(1) no
  Ir(1) C(27) C(28) Mo(1) . . . . -70.1(7) no
  Ir(1) C(27) C(28) Mo(2) . . . . 72.0(7) no
  Ir(1) C(27) C(28) C(29) . . . . 178(1) no
  Ir(2) Ir(1) Mo(1) C(5) . . . . -142.7(8) no
  Ir(2) Ir(1) Mo(1) C(6) . . . . -51.3(6) no
  Ir(2) Ir(1) Mo(1) C(9) . . . . -74(3) no
  Ir(2) Ir(1) Mo(1) C(10) . . . . -135(1) no
  Ir(2) Ir(1) Mo(1) C(11) . . . . 178.5(8) no
  Ir(2) Ir(1) Mo(1) C(12) . . . . 130(1) no
  Ir(2) Ir(1) Mo(1) C(13) . . . . 59(4) no
  Ir(2) Ir(1) Mo(1) C(27) . . . . 89.1(6) no
  Ir(2) Ir(1) Mo(1) C(28) . . . . 53.9(4) no
  Ir(2) Ir(1) Mo(2) C(7) . . . . 119.6(7) no
  Ir(2) Ir(1) Mo(2) C(8) . . . . 38.1(6) no
  Ir(2) Ir(1) Mo(2) C(15) . . . . 119(1) no
  Ir(2) Ir(1) Mo(2) C(16) . . . . -110(2) no
  Ir(2) Ir(1) Mo(2) C(17) . . . . -129(2) no
  Ir(2) Ir(1) Mo(2) C(18) . . . . -165(2) no
  Ir(2) Ir(1) Mo(2) C(19) . . . . 154(1) no
  Ir(2) Ir(1) Mo(2) C(27) . . . . -89.7(6) no
  Ir(2) Ir(1) Mo(2) C(28) . . . . -53.3(4) no
  Ir(2) Ir(1) C(1) O(1) . . . . 129(9) no
  Ir(2) Ir(1) C(2) O(2) . . . . -37.5(3) no
  Ir(2) Ir(1) C(5) Mo(1) . . . . 32.3(6) no
  Ir(2) Ir(1) C(5) O(5) . . . . -154(2) no
  Ir(2) Ir(1) C(7) Mo(2) . . . . -49.8(5) no
  Ir(2) Ir(1) C(7) O(7) . . . . 130(2) no
  Ir(2) Ir(1) C(27) Mo(1) . . . . -65.3(3) no
  Ir(2) Ir(1) C(27) Mo(2) . . . . 66.5(3) no
  Ir(2) Ir(1) C(27) C(26) . . . . 178(1) no
  Ir(2) Ir(1) C(27) C(28) . . . . -0.3(9) no
  Ir(2) Mo(1) Ir(1) Mo(2) . . . . -51.77(4) no
  Ir(2) Mo(1) Ir(1) C(1) . . . . -169.2(6) no
  Ir(2) Mo(1) Ir(1) C(2) . . . . 81.1(9) no
  Ir(2) Mo(1) Ir(1) C(5) . . . . 142.7(8) no
  Ir(2) Mo(1) Ir(1) C(7) . . . . -41.0(8) no
  Ir(2) Mo(1) Ir(1) C(27) . . . . -89.1(6) no
  Ir(2) Mo(1) C(5) O(5) . . . . 162(4) no
  Ir(2) Mo(1) C(6) O(6) . . . . -176(4) no
  Ir(2) Mo(1) C(9) C(10) . . . . -150(2) no
  Ir(2) Mo(1) C(9) C(13) . . . . 97(2) no
  Ir(2) Mo(1) C(10) C(9) . . . . 50(2) no
  Ir(2) Mo(1) C(10) C(11) . . . . 170(1) no
  Ir(2) Mo(1) C(11) C(10) . . . . -74(6) no
  Ir(2) Mo(1) C(11) C(12) . . . . 38(6) no
  Ir(2) Mo(1) C(12) C(11) . . . . -174(1) no
  Ir(2) Mo(1) C(12) C(13) . . . . -54(2) no
  Ir(2) Mo(1) C(13) C(9) . . . . -99(2) no
  Ir(2) Mo(1) C(13) C(12) . . . . 145(2) no
  Ir(2) Mo(1) C(13) C(14) . . . . 14(5) no
  Ir(2) Mo(1) C(27) Mo(2) . . . . -0.9(6) no
  Ir(2) Mo(1) C(27) C(26) . . . . -173(1) no
  Ir(2) Mo(1) C(27) C(28) . . . . -47.6(8) no
  Ir(2) Mo(1) C(28) Mo(2) . . . . 63.1(7) no
  Ir(2) Mo(1) C(28) C(27) . . . . 113(1) no
  Ir(2) Mo(1) C(28) C(29) . . . . -125(1) no
  Ir(2) Mo(2) Ir(1) Mo(1) . . . . 51.13(5) no
  Ir(2) Mo(2) Ir(1) C(1) . . . . 174.5(7) no
  Ir(2) Mo(2) Ir(1) C(2) . . . . -73.0(7) no
  Ir(2) Mo(2) Ir(1) C(5) . . . . 67.1(8) no
  Ir(2) Mo(2) Ir(1) C(7) . . . . -119.6(7) no
  Ir(2) Mo(2) Ir(1) C(27) . . . . 89.7(6) no
  Ir(2) Mo(2) C(7) O(7) . . . . -133(5) no
  Ir(2) Mo(2) C(8) O(8) . . . . 180(4) no
  Ir(2) Mo(2) C(15) C(16) . . . . -101(2) no
  Ir(2) Mo(2) C(15) C(19) . . . . 156(2) no
  Ir(2) Mo(2) C(16) C(15) . . . . 112(2) no
  Ir(2) Mo(2) C(16) C(17) . . . . -126(3) no
  Ir(2) Mo(2) C(17) C(16) . . . . 80(4) no
  Ir(2) Mo(2) C(17) C(18) . . . . -162(2) no
  Ir(2) Mo(2) C(18) C(17) . . . . 59(5) no
  Ir(2) Mo(2) C(18) C(19) . . . . 172(2) no
  Ir(2) Mo(2) C(19) C(15) . . . . -56(3) no
  Ir(2) Mo(2) C(19) C(18) . . . . -175(2) no
  Ir(2) Mo(2) C(19) C(20) . . . . 64(4) no
  Ir(2) Mo(2) C(27) Mo(1) . . . . 0.9(6) no
  Ir(2) Mo(2) C(27) C(26) . . . . 173(1) no
  Ir(2) Mo(2) C(27) C(28) . . . . 47.2(8) no
  Ir(2) Mo(2) C(28) Mo(1) . . . . -62.3(7) no
  Ir(2) Mo(2) C(28) C(27) . . . . -113(1) no
  Ir(2) Mo(2) C(28) C(29) . . . . 126(1) no
  Ir(2) C(6) Mo(1) C(5) . . . . 109.4(8) no
  Ir(2) C(6) Mo(1) C(9) . . . . -136(1) no
  Ir(2) C(6) Mo(1) C(10) . . . . -169.4(9) no
  Ir(2) C(6) Mo(1) C(11) . . . . -172.9(8) no
  Ir(2) C(6) Mo(1) C(12) . . . . -127(1) no
  Ir(2) C(6) Mo(1) C(13) . . . . -111.3(9) no
  Ir(2) C(6) Mo(1) C(27) . . . . 22.0(8) no
  Ir(2) C(6) Mo(1) C(28) . . . . -10.5(6) no
  Ir(2) C(8) Mo(2) C(7) . . . . -95.1(6) no
  Ir(2) C(8) Mo(2) C(15) . . . . 164(1) no
  Ir(2) C(8) Mo(2) C(16) . . . . 131(1) no
  Ir(2) C(8) Mo(2) C(17) . . . . 129(2) no
  Ir(2) C(8) Mo(2) C(18) . . . . 171(2) no
  Ir(2) C(8) Mo(2) C(19) . . . . -173.9(6) no
  Ir(2) C(8) Mo(2) C(27) . . . . 3.5(8) no
  Ir(2) C(8) Mo(2) C(28) . . . . 27.8(5) no
  Ir(2) C(28) Mo(1) C(5) . . . . -82.3(9) no
  Ir(2) C(28) Mo(1) C(6) . . . . 11.6(7) no
  Ir(2) C(28) Mo(1) C(9) . . . . 91(1) no
  Ir(2) C(28) Mo(1) C(10) . . . . 129(3) no
  Ir(2) C(28) Mo(1) C(11) . . . . 172.2(8) no
  Ir(2) C(28) Mo(1) C(12) . . . . 150.1(9) no
  Ir(2) C(28) Mo(1) C(13) . . . . 115(1) no
  Ir(2) C(28) Mo(1) C(27) . . . . -113(1) no
  Ir(2) C(28) Mo(2) C(7) . . . . 58.7(9) no
  Ir(2) C(28) Mo(2) C(8) . . . . -30.9(6) no
  Ir(2) C(28) Mo(2) C(15) . . . . -110.1(9) no
  Ir(2) C(28) Mo(2) C(16) . . . . -130(2) no
  Ir(2) C(28) Mo(2) C(17) . . . . -159(1) no
  Ir(2) C(28) Mo(2) C(18) . . . . 177(1) no
  Ir(2) C(28) Mo(2) C(19) . . . . -162(2) no
  Ir(2) C(28) Mo(2) C(27) . . . . 113(1) no
  Ir(2) C(28) C(27) Mo(1) . . . . 70.5(7) no
  Ir(2) C(28) C(27) Mo(2) . . . . -71.6(7) no
  Ir(2) C(28) C(27) C(26) . . . . -178(1) no
  Ir(2) C(28) C(29) C(30) . . . . -153(1) no
  Ir(2) C(28) C(29) C(34) . . . . 27(2) no
  Mo(1) Ir(1) Ir(2) Mo(2) . . . . -117.44(5) no
  Mo(1) Ir(1) Ir(2) C(3) . . . . -7(3) no
  Mo(1) Ir(1) Ir(2) C(4) . . . . 125.8(6) no
  Mo(1) Ir(1) Ir(2) C(6) . . . . 42.9(5) no
  Mo(1) Ir(1) Ir(2) C(8) . . . . -148.7(4) no
  Mo(1) Ir(1) Ir(2) C(28) . . . . -59.8(4) no
  Mo(1) Ir(1) Mo(2) C(7) . . . . 170.8(7) no
  Mo(1) Ir(1) Mo(2) C(8) . . . . 89.2(6) no
  Mo(1) Ir(1) Mo(2) C(15) . . . . 170(1) no
  Mo(1) Ir(1) Mo(2) C(16) . . . . -59(2) no
  Mo(1) Ir(1) Mo(2) C(17) . . . . -77(2) no
  Mo(1) Ir(1) Mo(2) C(18) . . . . -114(2) no
  Mo(1) Ir(1) Mo(2) C(19) . . . . -155(1) no
  Mo(1) Ir(1) Mo(2) C(27) . . . . -38.5(6) no
  Mo(1) Ir(1) Mo(2) C(28) . . . . -2.2(4) no
  Mo(1) Ir(1) C(1) O(1) . . . . -150.9(1) no
  Mo(1) Ir(1) C(2) O(2) . . . . -97.1(3) no
  Mo(1) Ir(1) C(5) O(5) . . . . 173(3) no
  Mo(1) Ir(1) C(7) Mo(2) . . . . -15(1) no
  Mo(1) Ir(1) C(7) O(7) . . . . 165(2) no
  Mo(1) Ir(1) C(27) Mo(2) . . . . 131.8(6) no
  Mo(1) Ir(1) C(27) C(26) . . . . -117(1) no
  Mo(1) Ir(1) C(27) C(28) . . . . 65.0(9) no
  Mo(1) Ir(2) Ir(1) Mo(2) . . . . 117.44(5) no
  Mo(1) Ir(2) Ir(1) C(1) . . . . 85(4) no
  Mo(1) Ir(2) Ir(1) C(2) . . . . -114.1(7) no
  Mo(1) Ir(2) Ir(1) C(5) . . . . -25.8(6) no
  Mo(1) Ir(2) Ir(1) C(7) . . . . 156.1(5) no
  Mo(1) Ir(2) Ir(1) C(27) . . . . 60.0(4) no
  Mo(1) Ir(2) Mo(2) C(7) . . . . -98.9(6) no
  Mo(1) Ir(2) Mo(2) C(8) . . . . 176.2(7) no
  Mo(1) Ir(2) Mo(2) C(15) . . . . 155(2) no
  Mo(1) Ir(2) Mo(2) C(16) . . . . 105(2) no
  Mo(1) Ir(2) Mo(2) C(17) . . . . 69(2) no
  Mo(1) Ir(2) Mo(2) C(18) . . . . 24(4) no
  Mo(1) Ir(2) Mo(2) C(19) . . . . -168(2) no
  Mo(1) Ir(2) Mo(2) C(27) . . . . -0.6(4) no
  Mo(1) Ir(2) Mo(2) C(28) . . . . 35.3(5) no
  Mo(1) Ir(2) C(3) O(3) . . . . 70.3(3) no
  Mo(1) Ir(2) C(4) O(4) . . . . -20.0875 no
  Mo(1) Ir(2) C(6) O(6) . . . . 178(2) no
  Mo(1) Ir(2) C(8) Mo(2) . . . . -6(1) no
  Mo(1) Ir(2) C(8) O(8) . . . . 174(1) no
  Mo(1) Ir(2) C(28) Mo(2) . . . . -135.9(5) no
  Mo(1) Ir(2) C(28) C(27) . . . . -68.8(9) no
  Mo(1) Ir(2) C(28) C(29) . . . . 113(2) no
  Mo(1) C(5) Ir(1) Mo(2) . . . . -23(1) no
  Mo(1) C(5) Ir(1) C(1) . . . . -138.8(9) no
  Mo(1) C(5) Ir(1) C(2) . . . . 125.7(9) no
  Mo(1) C(5) Ir(1) C(7) . . . . -162(5) no
  Mo(1) C(5) Ir(1) C(27) . . . . -40.7(7) no
  Mo(1) C(6) Ir(2) Mo(2) . . . . -31.6(9) no
  Mo(1) C(6) Ir(2) C(3) . . . . 112.0(8) no
  Mo(1) C(6) Ir(2) C(4) . . . . -157.0(9) no
  Mo(1) C(6) Ir(2) C(8) . . . . -126(3) no
  Mo(1) C(6) Ir(2) C(28) . . . . 11.6(7) no
  Mo(1) C(9) C(10) C(11) . . . . -65(2) no
  Mo(1) C(9) C(13) C(12) . . . . 62(2) no
  Mo(1) C(9) C(13) C(14) . . . . -123(3) no
  Mo(1) C(10) C(9) C(13) . . . . 64(2) no
  Mo(1) C(10) C(11) C(12) . . . . -62(1) no
  Mo(1) C(11) C(10) C(9) . . . . 64(2) no
  Mo(1) C(11) C(12) C(13) . . . . -66(2) no
  Mo(1) C(12) C(11) C(10) . . . . 63(2) no
  Mo(1) C(12) C(13) C(9) . . . . -64(2) no
  Mo(1) C(12) C(13) C(14) . . . . 123(4) no
  Mo(1) C(13) C(9) C(10) . . . . -63(2) no
  Mo(1) C(13) C(12) C(11) . . . . 67(2) no
  Mo(1) C(27) Ir(1) Mo(2) . . . . -131.8(6) no
  Mo(1) C(27) Ir(1) C(1) . . . . 118.7(7) no
  Mo(1) C(27) Ir(1) C(2) . . . . -40(4) no
  Mo(1) C(27) Ir(1) C(5) . . . . 33.9(6) no
  Mo(1) C(27) Ir(1) C(7) . . . . -152.5(6) no
  Mo(1) C(27) Mo(2) C(7) . . . . 90.2(9) no
  Mo(1) C(27) Mo(2) C(8) . . . . -2(1) no
  Mo(1) C(27) Mo(2) C(15) . . . . -138(2) no
  Mo(1) C(27) Mo(2) C(16) . . . . -121(1) no
  Mo(1) C(27) Mo(2) C(17) . . . . -141(2) no
  Mo(1) C(27) Mo(2) C(18) . . . . -173(1) no
  Mo(1) C(27) Mo(2) C(19) . . . . 174.3(8) no
  Mo(1) C(27) Mo(2) C(28) . . . . -46.4(8) no
  Mo(1) C(27) C(26) C(25) . . . . -30(2) no
  Mo(1) C(27) C(28) Mo(2) . . . . 142.1(5) no
  Mo(1) C(27) C(28) C(29) . . . . -112(2) no
  Mo(1) C(28) Ir(2) Mo(2) . . . . 135.9(5) no
  Mo(1) C(28) Ir(2) C(3) . . . . -101.2(8) no
  Mo(1) C(28) Ir(2) C(4) . . . . 96(4) no
  Mo(1) C(28) Ir(2) C(6) . . . . -10.0(6) no
  Mo(1) C(28) Ir(2) C(8) . . . . 161.6(5) no
  Mo(1) C(28) Mo(2) C(7) . . . . -4(1) no
  Mo(1) C(28) Mo(2) C(8) . . . . -93(1) no
  Mo(1) C(28) Mo(2) C(15) . . . . -172.4(9) no
  Mo(1) C(28) Mo(2) C(16) . . . . 167(2) no
  Mo(1) C(28) Mo(2) C(17) . . . . 139(2) no
  Mo(1) C(28) Mo(2) C(18) . . . . 115(1) no
  Mo(1) C(28) Mo(2) C(19) . . . . 135(2) no
  Mo(1) C(28) Mo(2) C(27) . . . . 50.6(9) no
  Mo(1) C(28) C(27) Mo(2) . . . . -142.1(5) no
  Mo(1) C(28) C(27) C(26) . . . . 112(2) no
  Mo(1) C(28) C(29) C(30) . . . . -60(2) no
  Mo(1) C(28) C(29) C(34) . . . . 120(1) no
  Mo(2) Ir(1) Ir(2) C(3) . . . . 111(3) no
  Mo(2) Ir(1) Ir(2) C(4) . . . . -116.8(6) no
  Mo(2) Ir(1) Ir(2) C(6) . . . . 160.3(5) no
  Mo(2) Ir(1) Ir(2) C(8) . . . . -31.2(4) no
  Mo(2) Ir(1) Ir(2) C(28) . . . . 57.7(4) no
  Mo(2) Ir(1) Mo(1) C(5) . . . . 165.6(8) no
  Mo(2) Ir(1) Mo(1) C(6) . . . . -103.1(6) no
  Mo(2) Ir(1) Mo(1) C(9) . . . . -126(3) no
  Mo(2) Ir(1) Mo(1) C(10) . . . . 173(1) no
  Mo(2) Ir(1) Mo(1) C(11) . . . . 126.7(8) no
  Mo(2) Ir(1) Mo(1) C(12) . . . . 78(1) no
  Mo(2) Ir(1) Mo(1) C(13) . . . . 7(4) no
  Mo(2) Ir(1) Mo(1) C(27) . . . . 37.4(6) no
  Mo(2) Ir(1) Mo(1) C(28) . . . . 2.1(4) no
  Mo(2) Ir(1) C(1) O(1) . . . . 99.1(1) no
  Mo(2) Ir(1) C(2) O(2) . . . . 19.9(3) no
  Mo(2) Ir(1) C(5) O(5) . . . . 151(2) no
  Mo(2) Ir(1) C(7) O(7) . . . . -180(2) no
  Mo(2) Ir(1) C(27) C(26) . . . . 112(1) no
  Mo(2) Ir(1) C(27) C(28) . . . . -67(1) no
  Mo(2) Ir(2) Ir(1) C(1) . . . . -33(4) no
  Mo(2) Ir(2) Ir(1) C(2) . . . . 128.5(7) no
  Mo(2) Ir(2) Ir(1) C(5) . . . . -143.2(6) no
  Mo(2) Ir(2) Ir(1) C(7) . . . . 38.6(5) no
  Mo(2) Ir(2) Ir(1) C(27) . . . . -57.5(4) no
  Mo(2) Ir(2) Mo(1) C(5) . . . . 83.0(5) no
  Mo(2) Ir(2) Mo(1) C(6) . . . . 159.6(6) no
  Mo(2) Ir(2) Mo(1) C(9) . . . . -152(1) no
  Mo(2) Ir(2) Mo(1) C(10) . . . . 178(1) no
  Mo(2) Ir(2) Mo(1) C(11) . . . . -116(6) no
  Mo(2) Ir(2) Mo(1) C(12) . . . . -83(1) no
  Mo(2) Ir(2) Mo(1) C(13) . . . . -113(1) no
  Mo(2) Ir(2) Mo(1) C(27) . . . . 0.6(4) no
  Mo(2) Ir(2) Mo(1) C(28) . . . . -34.3(5) no
  Mo(2) Ir(2) C(3) O(3) . . . . 179.9625 no
  Mo(2) Ir(2) C(4) O(4) . . . . -143.2675 no
  Mo(2) Ir(2) C(6) O(6) . . . . 146(1) no
  Mo(2) Ir(2) C(8) O(8) . . . . -180(2) no
  Mo(2) Ir(2) C(28) C(27) . . . . 67(1) no
  Mo(2) Ir(2) C(28) C(29) . . . . -111(1) no
  Mo(2) C(7) Ir(1) C(1) . . . . 121.2(8) no
  Mo(2) C(7) Ir(1) C(2) . . . . -143.6(9) no
  Mo(2) C(7) Ir(1) C(5) . . . . 144(5) no
  Mo(2) C(7) Ir(1) C(27) . . . . 23.4(7) no
  Mo(2) C(8) Ir(2) C(3) . . . . -130.8(8) no
  Mo(2) C(8) Ir(2) C(4) . . . . 138.8(9) no
  Mo(2) C(8) Ir(2) C(6) . . . . 108(3) no
  Mo(2) C(8) Ir(2) C(28) . . . . -30.4(6) no
  Mo(2) C(15) C(16) C(17) . . . . -63(3) no
  Mo(2) C(15) C(19) C(18) . . . . 63(2) no
  Mo(2) C(15) C(19) C(20) . . . . -125(2) no
  Mo(2) C(16) C(15) C(19) . . . . 70(1) no
  Mo(2) C(16) C(17) C(18) . . . . -70(3) no
  Mo(2) C(17) C(16) C(15) . . . . 62(3) no
  Mo(2) C(17) C(18) C(19) . . . . -65(2) no
  Mo(2) C(18) C(17) C(16) . . . . 70(4) no
  Mo(2) C(18) C(19) C(15) . . . . -64(2) no
  Mo(2) C(18) C(19) C(20) . . . . 125(2) no
  Mo(2) C(19) C(15) C(16) . . . . -66(1) no
  Mo(2) C(19) C(18) C(17) . . . . 63(2) no
  Mo(2) C(27) Ir(1) C(1) . . . . -109.5(7) no
  Mo(2) C(27) Ir(1) C(2) . . . . 92(4) no
  Mo(2) C(27) Ir(1) C(5) . . . . 165.7(6) no
  Mo(2) C(27) Ir(1) C(7) . . . . -20.7(6) no
  Mo(2) C(27) Mo(1) C(5) . . . . -107(1) no
  Mo(2) C(27) Mo(1) C(6) . . . . -20(1) no
  Mo(2) C(27) Mo(1) C(9) . . . . 98(2) no
  Mo(2) C(27) Mo(1) C(10) . . . . -177(1) no
  Mo(2) C(27) Mo(1) C(11) . . . . 173.3(9) no
  Mo(2) C(27) Mo(1) C(12) . . . . 137(1) no
  Mo(2) C(27) Mo(1) C(13) . . . . 104(1) no
  Mo(2) C(27) Mo(1) C(28) . . . . 46.8(9) no
  Mo(2) C(27) C(26) C(25) . . . . 157(2) no
  Mo(2) C(27) C(28) C(29) . . . . 106(2) no
  Mo(2) C(28) Ir(2) C(3) . . . . 122.8(8) no
  Mo(2) C(28) Ir(2) C(4) . . . . -40(4) no
  Mo(2) C(28) Ir(2) C(6) . . . . -145.9(5) no
  Mo(2) C(28) Ir(2) C(8) . . . . 25.7(6) no
  Mo(2) C(28) Mo(1) C(5) . . . . -19(1) no
  Mo(2) C(28) Mo(1) C(6) . . . . 75(1) no
  Mo(2) C(28) Mo(1) C(9) . . . . 154(1) no
  Mo(2) C(28) Mo(1) C(10) . . . . -168(3) no
  Mo(2) C(28) Mo(1) C(11) . . . . -125(1) no
  Mo(2) C(28) Mo(1) C(12) . . . . -147(1) no
  Mo(2) C(28) Mo(1) C(13) . . . . 178(1) no
  Mo(2) C(28) Mo(1) C(27) . . . . -50(1) no
  Mo(2) C(28) C(27) C(26) . . . . -106(2) no
  Mo(2) C(28) C(29) C(30) . . . . 113(2) no
  Mo(2) C(28) C(29) C(34) . . . . -67(2) no
  O(1) C(1) Ir(1) C(2) . . . . -31.6(1) no
  O(1) C(1) Ir(1) C(5) . . . . -118.9(1) no
  O(1) C(1) Ir(1) C(7) . . . . 58.1(1) no
  O(1) C(1) Ir(1) C(27) . . . . 153.4(1) no
  O(2) C(2) Ir(1) C(1) . . . . 139.4(3) no
  O(2) C(2) Ir(1) C(5) . . . . -135.8(3) no
  O(2) C(2) Ir(1) C(7) . . . . 51.4(3) no
  O(2) C(2) Ir(1) C(27) . . . . -61.6(3) no
  O(3) C(3) Ir(2) C(4) . . . . -56.6(3) no
  O(3) C(3) Ir(2) C(6) . . . . 27.5(3) no
  O(3) C(3) Ir(2) C(8) . . . . -141.9(3) no
  O(3) C(3) Ir(2) C(28) . . . . 126.9(3) no
  O(4) C(4) Ir(2) C(3) . . . . 89.1321 no
  O(4) C(4) Ir(2) C(6) . . . . -0.3291 no
  O(4) C(4) Ir(2) C(8) . . . . -173.8955 no
  O(4) C(4) Ir(2) C(28) . . . . -108.1011 no
  O(5) C(5) Ir(1) C(1) . . . . 35(2) no
  O(5) C(5) Ir(1) C(2) . . . . -61(2) no
  O(5) C(5) Ir(1) C(7) . . . . 11(7) no
  O(5) C(5) Ir(1) C(27) . . . . 133(2) no
  O(5) C(5) Mo(1) C(6) . . . . 109(4) no
  O(5) C(5) Mo(1) C(9) . . . . 36(5) no
  O(5) C(5) Mo(1) C(10) . . . . 18(4) no
  O(5) C(5) Mo(1) C(11) . . . . -16(4) no
  O(5) C(5) Mo(1) C(12) . . . . -28(5) no
  O(5) C(5) Mo(1) C(13) . . . . 5(5) no
  O(5) C(5) Mo(1) C(27) . . . . -132(4) no
  O(5) C(5) Mo(1) C(28) . . . . -149(4) no
  O(6) C(6) Ir(2) C(3) . . . . -70(2) no
  O(6) C(6) Ir(2) C(4) . . . . 21(2) no
  O(6) C(6) Ir(2) C(8) . . . . 52(4) no
  O(6) C(6) Ir(2) C(28) . . . . -171(2) no
  O(6) C(6) Mo(1) C(5) . . . . -67(3) no
  O(6) C(6) Mo(1) C(9) . . . . 48(3) no
  O(6) C(6) Mo(1) C(10) . . . . 14(3) no
  O(6) C(6) Mo(1) C(11) . . . . 11(4) no
  O(6) C(6) Mo(1) C(12) . . . . 56(4) no
  O(6) C(6) Mo(1) C(13) . . . . 72(3) no
  O(6) C(6) Mo(1) C(27) . . . . -154(3) no
  O(6) C(6) Mo(1) C(28) . . . . 173(3) no
  O(7) C(7) Ir(1) C(1) . . . . -59(2) no
  O(7) C(7) Ir(1) C(2) . . . . 37(2) no
  O(7) C(7) Ir(1) C(5) . . . . -35(7) no
  O(7) C(7) Ir(1) C(27) . . . . -156(2) no
  O(7) C(7) Mo(2) C(8) . . . . -79(5) no
  O(7) C(7) Mo(2) C(15) . . . . 0(5) no
  O(7) C(7) Mo(2) C(16) . . . . 20(6) no
  O(7) C(7) Mo(2) C(17) . . . . 57(5) no
  O(7) C(7) Mo(2) C(18) . . . . 58(5) no
  O(7) C(7) Mo(2) C(19) . . . . 26(5) no
  O(7) C(7) Mo(2) C(27) . . . . 159(5) no
  O(7) C(7) Mo(2) C(28) . . . . -172(5) no
  O(8) C(8) Ir(2) C(3) . . . . 49(2) no
  O(8) C(8) Ir(2) C(4) . . . . -41(2) no
  O(8) C(8) Ir(2) C(6) . . . . -72(4) no
  O(8) C(8) Ir(2) C(28) . . . . 150(2) no
  O(8) C(8) Mo(2) C(7) . . . . 85(4) no
  O(8) C(8) Mo(2) C(15) . . . . -16(4) no
  O(8) C(8) Mo(2) C(16) . . . . -49(4) no
  O(8) C(8) Mo(2) C(17) . . . . -51(4) no
  O(8) C(8) Mo(2) C(18) . . . . -9(5) no
  O(8) C(8) Mo(2) C(19) . . . . 6(4) no
  O(8) C(8) Mo(2) C(27) . . . . -177(3) no
  O(8) C(8) Mo(2) C(28) . . . . -152(4) no
  C(1) Ir(1) Ir(2) C(3) . . . . 78(5) no
  C(1) Ir(1) Ir(2) C(4) . . . . -149(4) no
  C(1) Ir(1) Ir(2) C(6) . . . . 128(4) no
  C(1) Ir(1) Ir(2) C(8) . . . . -64(4) no
  C(1) Ir(1) Ir(2) C(28) . . . . 25(4) no
  C(1) Ir(1) Mo(1) C(5) . . . . 48(1) no
  C(1) Ir(1) Mo(1) C(6) . . . . 139.5(9) no
  C(1) Ir(1) Mo(1) C(9) . . . . 116(3) no
  C(1) Ir(1) Mo(1) C(10) . . . . 56(2) no
  C(1) Ir(1) Mo(1) C(11) . . . . 9(1) no
  C(1) Ir(1) Mo(1) C(12) . . . . -39(1) no
  C(1) Ir(1) Mo(1) C(13) . . . . -111(4) no
  C(1) Ir(1) Mo(1) C(27) . . . . -80.1(9) no
  C(1) Ir(1) Mo(1) C(28) . . . . -115.3(8) no
  C(1) Ir(1) Mo(2) C(7) . . . . -66(1) no
  C(1) Ir(1) Mo(2) C(8) . . . . -147.3(9) no
  C(1) Ir(1) Mo(2) C(15) . . . . -66(2) no
  C(1) Ir(1) Mo(2) C(16) . . . . 64(3) no
  C(1) Ir(1) Mo(2) C(17) . . . . 46(2) no
  C(1) Ir(1) Mo(2) C(18) . . . . 10(2) no
  C(1) Ir(1) Mo(2) C(19) . . . . -31(1) no
  C(1) Ir(1) Mo(2) C(27) . . . . 84.9(9) no
  C(1) Ir(1) Mo(2) C(28) . . . . 121.3(8) no
  C(1) Ir(1) C(27) C(26) . . . . 2(2) no
  C(1) Ir(1) C(27) C(28) . . . . -176(1) no
  C(2) Ir(1) Ir(2) C(3) . . . . -121(3) no
  C(2) Ir(1) Ir(2) C(4) . . . . 11.7(9) no
  C(2) Ir(1) Ir(2) C(6) . . . . -71.2(9) no
  C(2) Ir(1) Ir(2) C(8) . . . . 97.3(8) no
  C(2) Ir(1) Ir(2) C(28) . . . . -173.8(8) no
  C(2) Ir(1) Mo(1) C(5) . . . . -62(1) no
  C(2) Ir(1) Mo(1) C(6) . . . . 30(1) no
  C(2) Ir(1) Mo(1) C(9) . . . . 7(3) no
  C(2) Ir(1) Mo(1) C(10) . . . . -54(2) no
  C(2) Ir(1) Mo(1) C(11) . . . . -100(1) no
  C(2) Ir(1) Mo(1) C(12) . . . . -149(2) no
  C(2) Ir(1) Mo(1) C(13) . . . . 140(4) no
  C(2) Ir(1) Mo(1) C(27) . . . . 170(1) no
  C(2) Ir(1) Mo(1) C(28) . . . . 135(1) no
  C(2) Ir(1) Mo(2) C(7) . . . . 47(1) no
  C(2) Ir(1) Mo(2) C(8) . . . . -34.9(9) no
  C(2) Ir(1) Mo(2) C(15) . . . . 46(2) no
  C(2) Ir(1) Mo(2) C(16) . . . . 177(3) no
  C(2) Ir(1) Mo(2) C(17) . . . . 158(2) no
  C(2) Ir(1) Mo(2) C(18) . . . . 122(2) no
  C(2) Ir(1) Mo(2) C(19) . . . . 81(1) no
  C(2) Ir(1) Mo(2) C(27) . . . . -162.7(9) no
  C(2) Ir(1) Mo(2) C(28) . . . . -126.3(8) no
  C(2) Ir(1) C(27) C(26) . . . . -157(3) no
  C(2) Ir(1) C(27) C(28) . . . . 25(4) no
  C(3) Ir(2) Ir(1) C(5) . . . . -33(3) no
  C(3) Ir(2) Ir(1) C(7) . . . . 149(3) no
  C(3) Ir(2) Ir(1) C(27) . . . . 53(3) no
  C(3) Ir(2) Mo(1) C(5) . . . . -150.3(9) no
  C(3) Ir(2) Mo(1) C(6) . . . . -73.8(9) no
  C(3) Ir(2) Mo(1) C(9) . . . . -26(1) no
  C(3) Ir(2) Mo(1) C(10) . . . . -56(1) no
  C(3) Ir(2) Mo(1) C(11) . . . . 10(6) no
  C(3) Ir(2) Mo(1) C(12) . . . . 44(1) no
  C(3) Ir(2) Mo(1) C(13) . . . . 13(1) no
  C(3) Ir(2) Mo(1) C(27) . . . . 127.2(8) no
  C(3) Ir(2) Mo(1) C(28) . . . . 92.3(9) no
  C(3) Ir(2) Mo(2) C(7) . . . . 148(1) no
  C(3) Ir(2) Mo(2) C(8) . . . . 63(1) no
  C(3) Ir(2) Mo(2) C(15) . . . . 42(2) no
  C(3) Ir(2) Mo(2) C(16) . . . . -8(2) no
  C(3) Ir(2) Mo(2) C(17) . . . . -44(2) no
  C(3) Ir(2) Mo(2) C(18) . . . . -89(4) no
  C(3) Ir(2) Mo(2) C(19) . . . . 79(2) no
  C(3) Ir(2) Mo(2) C(27) . . . . -114.0(9) no
  C(3) Ir(2) Mo(2) C(28) . . . . -78.1(9) no
  C(3) Ir(2) C(28) C(27) . . . . -170(1) no
  C(3) Ir(2) C(28) C(29) . . . . 12(2) no
  C(4) Ir(2) Ir(1) C(5) . . . . 100.0(9) no
  C(4) Ir(2) Ir(1) C(7) . . . . -78.2(8) no
  C(4) Ir(2) Ir(1) C(27) . . . . -174.3(8) no
  C(4) Ir(2) Mo(1) C(5) . . . . -48(1) no
  C(4) Ir(2) Mo(1) C(6) . . . . 28(1) no
  C(4) Ir(2) Mo(1) C(9) . . . . 76(1) no
  C(4) Ir(2) Mo(1) C(10) . . . . 46(2) no
  C(4) Ir(2) Mo(1) C(11) . . . . 112(6) no
  C(4) Ir(2) Mo(1) C(12) . . . . 146(1) no
  C(4) Ir(2) Mo(1) C(13) . . . . 115(2) no
  C(4) Ir(2) Mo(1) C(27) . . . . -130.7(9) no
  C(4) Ir(2) Mo(1) C(28) . . . . -166(1) no
  C(4) Ir(2) Mo(2) C(7) . . . . 37(1) no
  C(4) Ir(2) Mo(2) C(8) . . . . -48(1) no
  C(4) Ir(2) Mo(2) C(15) . . . . -69(2) no
  C(4) Ir(2) Mo(2) C(16) . . . . -118(2) no
  C(4) Ir(2) Mo(2) C(17) . . . . -155(2) no
  C(4) Ir(2) Mo(2) C(18) . . . . 160(4) no
  C(4) Ir(2) Mo(2) C(19) . . . . -31(2) no
  C(4) Ir(2) Mo(2) C(27) . . . . 135.7(9) no
  C(4) Ir(2) Mo(2) C(28) . . . . 171.6(9) no
  C(4) Ir(2) C(28) C(27) . . . . 27(4) no
  C(4) Ir(2) C(28) C(29) . . . . -150(4) no
  C(5) Ir(1) Ir(2) C(6) . . . . 17.1(8) no
  C(5) Ir(1) Ir(2) C(8) . . . . -174.5(7) no
  C(5) Ir(1) Ir(2) C(28) . . . . -85.6(7) no
  C(5) Ir(1) Mo(1) C(6) . . . . 91(1) no
  C(5) Ir(1) Mo(1) C(9) . . . . 68(3) no
  C(5) Ir(1) Mo(1) C(10) . . . . 7(2) no
  C(5) Ir(1) Mo(1) C(11) . . . . -39(1) no
  C(5) Ir(1) Mo(1) C(12) . . . . -88(1) no
  C(5) Ir(1) Mo(1) C(13) . . . . -159(4) no
  C(5) Ir(1) Mo(1) C(27) . . . . -128(1) no
  C(5) Ir(1) Mo(1) C(28) . . . . -163.4(9) no
  C(5) Ir(1) Mo(2) C(7) . . . . -173(1) no
  C(5) Ir(1) Mo(2) C(8) . . . . 105(1) no
  C(5) Ir(1) Mo(2) C(15) . . . . -174(2) no
  C(5) Ir(1) Mo(2) C(16) . . . . -43(3) no
  C(5) Ir(1) Mo(2) C(17) . . . . -61(2) no
  C(5) Ir(1) Mo(2) C(18) . . . . -98(2) no
  C(5) Ir(1) Mo(2) C(19) . . . . -139(1) no
  C(5) Ir(1) Mo(2) C(27) . . . . -23(1) no
  C(5) Ir(1) Mo(2) C(28) . . . . 13.8(9) no
  C(5) Ir(1) C(27) C(26) . . . . -83(1) no
  C(5) Ir(1) C(27) C(28) . . . . 99(1) no
  C(5) Mo(1) Ir(1) C(7) . . . . 176(1) no
  C(5) Mo(1) Ir(1) C(27) . . . . 128(1) no
  C(5) Mo(1) Ir(2) C(6) . . . . -76.6(8) no
  C(5) Mo(1) Ir(2) C(8) . . . . 87.2(9) no
  C(5) Mo(1) Ir(2) C(28) . . . . 117.4(8) no
  C(5) Mo(1) C(9) C(10) . . . . -31(2) no
  C(5) Mo(1) C(9) C(13) . . . . -143(2) no
  C(5) Mo(1) C(10) C(9) . . . . 152(2) no
  C(5) Mo(1) C(10) C(11) . . . . -87(2) no
  C(5) Mo(1) C(11) C(10) . . . . 87(2) no
  C(5) Mo(1) C(11) C(12) . . . . -161(2) no
  C(5) Mo(1) C(12) C(11) . . . . 21(2) no
  C(5) Mo(1) C(12) C(13) . . . . 141(2) no
  C(5) Mo(1) C(13) C(9) . . . . 56(3) no
  C(5) Mo(1) C(13) C(12) . . . . -60(3) no
  C(5) Mo(1) C(13) C(14) . . . . 170(3) no
  C(5) Mo(1) C(27) C(26) . . . . 81(1) no
  C(5) Mo(1) C(27) C(28) . . . . -154(1) no
  C(5) Mo(1) C(28) C(27) . . . . 31(1) no
  C(5) Mo(1) C(28) C(29) . . . . 153(1) no
  C(6) Ir(2) Ir(1) C(7) . . . . -161.1(7) no
  C(6) Ir(2) Ir(1) C(27) . . . . 102.8(7) no
  C(6) Ir(2) Mo(1) C(9) . . . . 48(1) no
  C(6) Ir(2) Mo(1) C(10) . . . . 18(1) no
  C(6) Ir(2) Mo(1) C(11) . . . . 84(6) no
  C(6) Ir(2) Mo(1) C(12) . . . . 117(1) no
  C(6) Ir(2) Mo(1) C(13) . . . . 87(1) no
  C(6) Ir(2) Mo(1) C(27) . . . . -159.0(7) no
  C(6) Ir(2) Mo(1) C(28) . . . . 166.0(8) no
  C(6) Ir(2) Mo(2) C(7) . . . . -76.9(9) no
  C(6) Ir(2) Mo(2) C(8) . . . . -162(1) no
  C(6) Ir(2) Mo(2) C(15) . . . . 177(2) no
  C(6) Ir(2) Mo(2) C(16) . . . . 127(2) no
  C(6) Ir(2) Mo(2) C(17) . . . . 91(2) no
  C(6) Ir(2) Mo(2) C(18) . . . . 46(4) no
  C(6) Ir(2) Mo(2) C(19) . . . . -146(2) no
  C(6) Ir(2) Mo(2) C(27) . . . . 21.4(8) no
  C(6) Ir(2) Mo(2) C(28) . . . . 57.3(9) no
  C(6) Ir(2) C(28) C(27) . . . . -79(1) no
  C(6) Ir(2) C(28) C(29) . . . . 103(1) no
  C(6) Mo(1) Ir(1) C(7) . . . . -92(1) no
  C(6) Mo(1) Ir(1) C(27) . . . . -140.4(9) no
  C(6) Mo(1) Ir(2) C(8) . . . . 163.8(9) no
  C(6) Mo(1) Ir(2) C(28) . . . . -166.0(8) no
  C(6) Mo(1) C(9) C(10) . . . . -111(2) no
  C(6) Mo(1) C(9) C(13) . . . . 136(2) no
  C(6) Mo(1) C(10) C(9) . . . . 64(2) no
  C(6) Mo(1) C(10) C(11) . . . . -175(2) no
  C(6) Mo(1) C(11) C(10) . . . . 6(2) no
  C(6) Mo(1) C(11) C(12) . . . . 118(2) no
  C(6) Mo(1) C(12) C(11) . . . . -92(2) no
  C(6) Mo(1) C(12) C(13) . . . . 29(3) no
  C(6) Mo(1) C(13) C(9) . . . . -43(2) no
  C(6) Mo(1) C(13) C(12) . . . . -159(2) no
  C(6) Mo(1) C(13) C(14) . . . . 70(4) no
  C(6) Mo(1) C(27) C(26) . . . . 168(1) no
  C(6) Mo(1) C(27) C(28) . . . . -67(1) no
  C(6) Mo(1) C(28) C(27) . . . . 124(1) no
  C(6) Mo(1) C(28) C(29) . . . . -113(1) no
  C(7) Ir(1) Ir(2) C(8) . . . . 7.4(6) no
  C(7) Ir(1) Ir(2) C(28) . . . . 96.3(7) no
  C(7) Ir(1) Mo(1) C(9) . . . . -115(3) no
  C(7) Ir(1) Mo(1) C(10) . . . . -176(2) no
  C(7) Ir(1) Mo(1) C(11) . . . . 137(1) no
  C(7) Ir(1) Mo(1) C(12) . . . . 89(1) no
  C(7) Ir(1) Mo(1) C(13) . . . . 18(4) no
  C(7) Ir(1) Mo(1) C(27) . . . . 48(1) no
  C(7) Ir(1) Mo(1) C(28) . . . . 12.9(9) no
  C(7) Ir(1) Mo(2) C(8) . . . . -81.5(9) no
  C(7) Ir(1) Mo(2) C(15) . . . . 0(2) no
  C(7) Ir(1) Mo(2) C(16) . . . . 130(3) no
  C(7) Ir(1) Mo(2) C(17) . . . . 112(2) no
  C(7) Ir(1) Mo(2) C(18) . . . . 76(2) no
  C(7) Ir(1) Mo(2) C(19) . . . . 35(1) no
  C(7) Ir(1) Mo(2) C(27) . . . . 150.7(9) no
  C(7) Ir(1) Mo(2) C(28) . . . . -172.9(8) no
  C(7) Ir(1) C(27) C(26) . . . . 91(1) no
  C(7) Ir(1) C(27) C(28) . . . . -87(1) no
  C(7) Mo(2) Ir(1) C(27) . . . . -150.7(9) no
  C(7) Mo(2) Ir(2) C(8) . . . . 84.9(9) no
  C(7) Mo(2) Ir(2) C(28) . . . . -134.2(8) no
  C(7) Mo(2) C(15) C(16) . . . . 156(2) no
  C(7) Mo(2) C(15) C(19) . . . . 53(2) no
  C(7) Mo(2) C(16) C(15) . . . . -33(4) no
  C(7) Mo(2) C(16) C(17) . . . . 89(5) no
  C(7) Mo(2) C(17) C(16) . . . . -115(4) no
  C(7) Mo(2) C(17) C(18) . . . . 3(3) no
  C(7) Mo(2) C(18) C(17) . . . . -178(3) no
  C(7) Mo(2) C(18) C(19) . . . . -65(2) no
  C(7) Mo(2) C(19) C(15) . . . . -127(2) no
  C(7) Mo(2) C(19) C(18) . . . . 114(2) no
  C(7) Mo(2) C(19) C(20) . . . . -7(4) no
  C(7) Mo(2) C(27) C(26) . . . . -97(1) no
  C(7) Mo(2) C(27) C(28) . . . . 137(1) no
  C(7) Mo(2) C(28) C(27) . . . . -54(1) no
  C(7) Mo(2) C(28) C(29) . . . . -176(1) no
  C(8) Ir(2) Ir(1) C(27) . . . . -88.7(6) no
  C(8) Ir(2) Mo(1) C(9) . . . . -148(1) no
  C(8) Ir(2) Mo(1) C(10) . . . . -178(1) no
  C(8) Ir(2) Mo(1) C(11) . . . . -112(6) no
  C(8) Ir(2) Mo(1) C(12) . . . . -79(1) no
  C(8) Ir(2) Mo(1) C(13) . . . . -109(2) no
  C(8) Ir(2) Mo(1) C(27) . . . . 4.7(8) no
  C(8) Ir(2) Mo(1) C(28) . . . . -30.2(9) no
  C(8) Ir(2) Mo(2) C(15) . . . . -21(2) no
  C(8) Ir(2) Mo(2) C(16) . . . . -71(2) no
  C(8) Ir(2) Mo(2) C(17) . . . . -107(2) no
  C(8) Ir(2) Mo(2) C(18) . . . . -152(4) no
  C(8) Ir(2) Mo(2) C(19) . . . . 16(2) no
  C(8) Ir(2) Mo(2) C(27) . . . . -176.8(8) no
  C(8) Ir(2) Mo(2) C(28) . . . . -140.9(8) no
  C(8) Ir(2) C(28) C(27) . . . . 93(1) no
  C(8) Ir(2) C(28) C(29) . . . . -85(1) no
  C(8) Mo(2) Ir(1) C(27) . . . . 127.8(8) no
  C(8) Mo(2) Ir(2) C(28) . . . . 140.9(8) no
  C(8) Mo(2) C(15) C(16) . . . . -118(3) no
  C(8) Mo(2) C(15) C(19) . . . . 138(2) no
  C(8) Mo(2) C(16) C(15) . . . . 61(2) no
  C(8) Mo(2) C(16) C(17) . . . . -177(4) no
  C(8) Mo(2) C(17) C(16) . . . . 4(5) no
  C(8) Mo(2) C(17) C(18) . . . . 123(3) no
  C(8) Mo(2) C(18) C(17) . . . . -86(4) no
  C(8) Mo(2) C(18) C(19) . . . . 27(3) no
  C(8) Mo(2) C(19) C(15) . . . . -42(2) no
  C(8) Mo(2) C(19) C(18) . . . . -162(2) no
  C(8) Mo(2) C(19) C(20) . . . . 77(4) no
  C(8) Mo(2) C(27) C(26) . . . . 170(1) no
  C(8) Mo(2) C(27) C(28) . . . . 44(1) no
  C(8) Mo(2) C(28) C(27) . . . . -144(1) no
  C(8) Mo(2) C(28) C(29) . . . . 95(1) no
  C(9) Mo(1) Ir(1) C(27) . . . . -163(3) no
  C(9) Mo(1) Ir(2) C(28) . . . . -118(1) no
  C(9) Mo(1) C(10) C(11) . . . . 121(3) no
  C(9) Mo(1) C(11) C(10) . . . . -36(2) no
  C(9) Mo(1) C(11) C(12) . . . . 76(2) no
  C(9) Mo(1) C(12) C(11) . . . . -83(2) no
  C(9) Mo(1) C(12) C(13) . . . . 38(2) no
  C(9) Mo(1) C(13) C(12) . . . . -116(3) no
  C(9) Mo(1) C(13) C(14) . . . . 113(5) no
  C(9) Mo(1) C(27) C(26) . . . . -74(3) no
  C(9) Mo(1) C(27) C(28) . . . . 52(3) no
  C(9) Mo(1) C(28) C(27) . . . . -156(1) no
  C(9) Mo(1) C(28) C(29) . . . . -34(2) no
  C(9) C(10) Mo(1) C(11) . . . . -121(3) no
  C(9) C(10) Mo(1) C(12) . . . . -80(2) no
  C(9) C(10) Mo(1) C(13) . . . . -39(2) no
  C(9) C(10) Mo(1) C(27) . . . . -136(2) no
  C(9) C(10) Mo(1) C(28) . . . . -55(4) no
  C(9) C(10) C(11) C(12) . . . . 3(3) no
  C(9) C(13) Mo(1) C(10) . . . . 40(2) no
  C(9) C(13) Mo(1) C(11) . . . . 80(2) no
  C(9) C(13) Mo(1) C(12) . . . . 116(3) no
  C(9) C(13) Mo(1) C(27) . . . . -176(2) no
  C(9) C(13) Mo(1) C(28) . . . . -146(2) no
  C(9) C(13) C(12) C(11) . . . . 3(3) no
  C(10) Mo(1) Ir(1) C(27) . . . . 136(2) no
  C(10) Mo(1) Ir(2) C(28) . . . . -148(1) no
  C(10) Mo(1) C(9) C(13) . . . . -112(3) no
  C(10) Mo(1) C(11) C(12) . . . . 112(2) no
  C(10) Mo(1) C(12) C(11) . . . . -39(2) no
  C(10) Mo(1) C(12) C(13) . . . . 81(2) no
  C(10) Mo(1) C(13) C(12) . . . . -76(2) no
  C(10) Mo(1) C(13) C(14) . . . . 154(5) no
  C(10) Mo(1) C(27) C(26) . . . . 10(2) no
  C(10) Mo(1) C(27) C(28) . . . . 136(2) no
  C(10) Mo(1) C(28) C(27) . . . . -118(3) no
  C(10) Mo(1) C(28) C(29) . . . . 4(3) no
  C(10) C(9) Mo(1) C(11) . . . . 34(2) no
  C(10) C(9) Mo(1) C(12) . . . . 76(2) no
  C(10) C(9) Mo(1) C(13) . . . . 112(3) no
  C(10) C(9) Mo(1) C(27) . . . . 122(3) no
  C(10) C(9) Mo(1) C(28) . . . . 156(2) no
  C(10) C(9) C(13) C(12) . . . . -1(3) no
  C(10) C(9) C(13) C(14) . . . . 174(3) no
  C(10) C(11) Mo(1) C(12) . . . . -112(2) no
  C(10) C(11) Mo(1) C(13) . . . . -77(2) no
  C(10) C(11) Mo(1) C(27) . . . . 172(2) no
  C(10) C(11) Mo(1) C(28) . . . . -151(2) no
  C(10) C(11) C(12) C(13) . . . . -3(3) no
  C(11) Mo(1) Ir(1) C(27) . . . . 89(1) no
  C(11) Mo(1) Ir(2) C(28) . . . . -82(6) no
  C(11) Mo(1) C(9) C(13) . . . . -79(2) no
  C(11) Mo(1) C(12) C(13) . . . . 120(2) no
  C(11) Mo(1) C(13) C(12) . . . . -36(2) no
  C(11) Mo(1) C(13) C(14) . . . . -166(5) no
  C(11) Mo(1) C(27) C(26) . . . . 1(2) no
  C(11) Mo(1) C(27) C(28) . . . . 127(1) no
  C(11) Mo(1) C(28) C(27) . . . . -75(1) no
  C(11) Mo(1) C(28) C(29) . . . . 47(2) no
  C(11) C(10) Mo(1) C(12) . . . . 41(2) no
  C(11) C(10) Mo(1) C(13) . . . . 82(2) no
  C(11) C(10) Mo(1) C(27) . . . . -15(3) no
  C(11) C(10) Mo(1) C(28) . . . . 65(4) no
  C(11) C(10) C(9) C(13) . . . . -1(3) no
  C(11) C(12) Mo(1) C(13) . . . . -120(2) no
  C(11) C(12) Mo(1) C(27) . . . . 115(1) no
  C(11) C(12) Mo(1) C(28) . . . . 151(1) no
  C(11) C(12) C(13) C(14) . . . . -171(3) no
  C(12) Mo(1) Ir(1) C(27) . . . . 41(1) no
  C(12) Mo(1) Ir(2) C(28) . . . . -49(1) no
  C(12) Mo(1) C(9) C(13) . . . . -37(2) no
  C(12) Mo(1) C(13) C(14) . . . . -130(6) no
  C(12) Mo(1) C(27) C(26) . . . . -35(2) no
  C(12) Mo(1) C(27) C(28) . . . . 91(1) no
  C(12) Mo(1) C(28) C(27) . . . . -97(1) no
  C(12) Mo(1) C(28) C(29) . . . . 25(1) no
  C(12) C(11) Mo(1) C(13) . . . . 35(2) no
  C(12) C(11) Mo(1) C(27) . . . . -77(2) no
  C(12) C(11) Mo(1) C(28) . . . . -39(2) no
  C(12) C(13) Mo(1) C(27) . . . . 68(2) no
  C(12) C(13) Mo(1) C(28) . . . . 98(2) no
  C(13) Mo(1) Ir(1) C(27) . . . . -31(4) no
  C(13) Mo(1) Ir(2) C(28) . . . . -79(1) no
  C(13) Mo(1) C(27) C(26) . . . . -68(2) no
  C(13) Mo(1) C(27) C(28) . . . . 58(1) no
  C(13) Mo(1) C(28) C(27) . . . . -132(1) no
  C(13) Mo(1) C(28) C(29) . . . . -10(2) no
  C(13) C(9) Mo(1) C(27) . . . . 9(4) no
  C(13) C(9) Mo(1) C(28) . . . . 43(2) no
  C(13) C(12) Mo(1) C(27) . . . . -124(2) no
  C(13) C(12) Mo(1) C(28) . . . . -89(2) no
  C(14) C(13) Mo(1) C(27) . . . . -62(5) no
  C(14) C(13) Mo(1) C(28) . . . . -33(4) no
  C(15) Mo(2) Ir(1) C(27) . . . . -151(2) no
  C(15) Mo(2) Ir(2) C(28) . . . . 120(2) no
  C(15) Mo(2) C(16) C(17) . . . . 122(4) no
  C(15) Mo(2) C(17) C(16) . . . . -38(3) no
  C(15) Mo(2) C(17) C(18) . . . . 80(3) no
  C(15) Mo(2) C(18) C(17) . . . . -79(2) no
  C(15) Mo(2) C(18) C(19) . . . . 34(2) no
  C(15) Mo(2) C(19) C(18) . . . . -119(3) no
  C(15) Mo(2) C(19) C(20) . . . . 119(5) no
  C(15) Mo(2) C(27) C(26) . . . . 34(3) no
  C(15) Mo(2) C(27) C(28) . . . . -92(2) no
  C(15) Mo(2) C(28) C(27) . . . . 137(1) no
  C(15) Mo(2) C(28) C(29) . . . . 16(2) no
  C(15) C(16) Mo(2) C(17) . . . . -122(4) no
  C(15) C(16) Mo(2) C(18) . . . . -85(2) no
  C(15) C(16) Mo(2) C(19) . . . . -41(1) no
  C(15) C(16) Mo(2) C(27) . . . . -167(2) no
  C(15) C(16) Mo(2) C(28) . . . . 157(2) no
  C(15) C(16) C(17) C(18) . . . . -8(5) no
  C(15) C(19) Mo(2) C(16) . . . . 47(2) no
  C(15) C(19) Mo(2) C(17) . . . . 82(2) no
  C(15) C(19) Mo(2) C(18) . . . . 119(3) no
  C(15) C(19) Mo(2) C(27) . . . . 141(2) no
  C(15) C(19) Mo(2) C(28) . . . . 87(3) no
  C(15) C(19) C(18) C(17) . . . . -1(3) no
  C(16) Mo(2) Ir(1) C(27) . . . . -21(3) no
  C(16) Mo(2) Ir(2) C(28) . . . . 70(2) no
  C(16) Mo(2) C(15) C(19) . . . . -103(2) no
  C(16) Mo(2) C(17) C(18) . . . . 118(5) no
  C(16) Mo(2) C(18) C(17) . . . . -32(3) no
  C(16) Mo(2) C(18) C(19) . . . . 81(2) no
  C(16) Mo(2) C(19) C(18) . . . . -72(2) no
  C(16) Mo(2) C(19) C(20) . . . . 167(5) no
  C(16) Mo(2) C(27) C(26) . . . . 51(2) no
  C(16) Mo(2) C(27) C(28) . . . . -75(1) no
  C(16) Mo(2) C(28) C(27) . . . . 117(2) no
  C(16) Mo(2) C(28) C(29) . . . . -5(2) no
  C(16) C(15) Mo(2) C(17) . . . . 28(2) no
  C(16) C(15) Mo(2) C(18) . . . . 67(2) no
  C(16) C(15) Mo(2) C(19) . . . . 103(2) no
  C(16) C(15) Mo(2) C(27) . . . . 25(4) no
  C(16) C(15) Mo(2) C(28) . . . . -33(3) no
  C(16) C(15) C(19) C(18) . . . . -3(2) no
  C(16) C(15) C(19) C(20) . . . . 169(2) no
  C(16) C(17) Mo(2) C(18) . . . . -118(5) no
  C(16) C(17) Mo(2) C(19) . . . . -78(3) no
  C(16) C(17) Mo(2) C(27) . . . . 140(4) no
  C(16) C(17) Mo(2) C(28) . . . . 104(4) no
  C(16) C(17) C(18) C(19) . . . . 6(5) no
  C(17) Mo(2) Ir(1) C(27) . . . . -39(2) no
  C(17) Mo(2) Ir(2) C(28) . . . . 34(2) no
  C(17) Mo(2) C(15) C(19) . . . . -75(2) no
  C(17) Mo(2) C(18) C(19) . . . . 113(3) no
  C(17) Mo(2) C(19) C(18) . . . . -37(2) no
  C(17) Mo(2) C(19) C(20) . . . . -158(5) no
  C(17) Mo(2) C(27) C(26) . . . . 31(2) no
  C(17) Mo(2) C(27) C(28) . . . . -95(2) no
  C(17) Mo(2) C(28) C(27) . . . . 89(2) no
  C(17) Mo(2) C(28) C(29) . . . . -33(2) no
  C(17) C(16) Mo(2) C(18) . . . . 37(3) no
  C(17) C(16) Mo(2) C(19) . . . . 81(3) no
  C(17) C(16) Mo(2) C(27) . . . . -45(4) no
  C(17) C(16) Mo(2) C(28) . . . . -80(4) no
  C(17) C(16) C(15) C(19) . . . . 7(4) no
  C(17) C(18) Mo(2) C(19) . . . . -113(3) no
  C(17) C(18) Mo(2) C(27) . . . . 83(3) no
  C(17) C(18) Mo(2) C(28) . . . . 50(3) no
  C(17) C(18) C(19) C(20) . . . . -172(3) no
  C(18) Mo(2) Ir(1) C(27) . . . . -75(2) no
  C(18) Mo(2) Ir(2) C(28) . . . . -11(4) no
  C(18) Mo(2) C(15) C(19) . . . . -36(2) no
  C(18) Mo(2) C(19) C(20) . . . . -121(5) no
  C(18) Mo(2) C(27) C(26) . . . . -1(2) no
  C(18) Mo(2) C(27) C(28) . . . . -127(1) no
  C(18) Mo(2) C(28) C(27) . . . . 64(1) no
  C(18) Mo(2) C(28) C(29) . . . . -57(2) no
  C(18) C(17) Mo(2) C(19) . . . . 40(2) no
  C(18) C(17) Mo(2) C(27) . . . . -101(3) no
  C(18) C(17) Mo(2) C(28) . . . . -138(3) no
  C(18) C(19) Mo(2) C(27) . . . . 21(2) no
  C(18) C(19) Mo(2) C(28) . . . . -32(3) no
  C(19) Mo(2) Ir(1) C(27) . . . . -116(1) no
  C(19) Mo(2) Ir(2) C(28) . . . . 157(2) no
  C(19) Mo(2) C(27) C(26) . . . . -13(2) no
  C(19) Mo(2) C(27) C(28) . . . . -139(1) no
  C(19) Mo(2) C(28) C(27) . . . . 85(2) no
  C(19) Mo(2) C(28) C(29) . . . . -37(2) no
  C(19) C(15) Mo(2) C(27) . . . . -78(4) no
  C(19) C(15) Mo(2) C(28) . . . . -136(2) no
  C(19) C(18) Mo(2) C(27) . . . . -164(2) no
  C(19) C(18) Mo(2) C(28) . . . . 163(2) no
  C(20) C(19) Mo(2) C(27) . . . . -100(4) no
  C(20) C(19) Mo(2) C(28) . . . . -153(3) no
  C(21) C(22) C(23) C(24) . . . . 91(7) no
  C(22) C(23) C(24) C(25) . . . . 40(6) no
  C(23) C(24) C(25) C(26) . . . . 174(2) no
  C(24) C(25) C(26) C(27) . . . . -172(2) no
  C(25) C(26) C(27) C(28) . . . . -117(2) no
  C(26) C(27) Mo(1) C(28) . . . . -125(2) no
  C(26) C(27) Mo(2) C(28) . . . . 126(2) no
  C(26) C(27) C(28) C(29) . . . . 0(3) no
  C(27) Ir(1) Ir(2) C(28) . . . . 0.2(6) no
  C(27) Ir(1) Mo(1) C(28) . . . . -35.2(7) no
  C(27) Ir(1) Mo(2) C(28) . . . . 36.4(7) no
  C(27) Mo(1) Ir(2) C(28) . . . . 34.9(6) no
  C(27) Mo(1) C(28) C(29) . . . . 122(2) no
  C(27) Mo(2) Ir(2) C(28) . . . . -35.9(6) no
  C(27) Mo(2) C(28) C(29) . . . . -121(2) no
  C(27) C(28) C(29) C(30) . . . . 29(3) no
  C(27) C(28) C(29) C(34) . . . . -151(2) no
  C(28) C(29) C(30) C(31) . . . . 179(2) no
  C(28) C(29) C(34) C(33) . . . . -179(2) no
  C(29) C(30) C(31) C(32) . . . . -2(3) no
  C(29) C(34) C(33) C(32) . . . . 0(3) no
  C(30) C(29) C(34) C(33) . . . . 1(3) no
  C(30) C(31) C(32) C(33) . . . . 3(3) no
  C(30) C(31) C(32) C(35) . . . . -176(2) no
  C(31) C(30) C(29) C(34) . . . . -1(2) no
  C(31) C(32) C(33) C(34) . . . . -2(3) no
  C(31) C(32) C(35) C(36) . . . . 10.9(3) no
  C(32) C(35) C(36) C(36) . . . 3_767 88.0(6) no
  C(33) C(32) C(35) C(36) . . . . -168.2(2) no
  C(34) C(33) C(32) C(35) . . . . 177(2) no
  C(35) C(36) C(36) C(35) . . 3_767 3_767 180.0000 no

#===END
